# Supplementary material for: Structural and climate drivers of the historic Masiere di Vedana rock avalanche (Belluno Dolomites, NE Italy)
Source: Copernicus journal article supplement (doi:10.5194/nhess-2019-413), 2020-02-14
Supplement: Supplementary file [file nhess-2019-413-RC1-supplement.pdf]

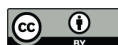

# Structural and climate drivers of the historic Masiere di Vedana rock avalanche (Belluno Dolomites, NE Italy)

Sandro Rossato<sup>1</sup>, Susan Ivy-Ochs<sup>2</sup>, Silvana Martin<sup>1</sup>, Alfio Viganò<sup>3</sup>, Christof Vockenhuber<sup>2</sup>, Manuel Rigo<sup>1</sup>, Giovanni Monegato<sup>4</sup>, Marco De Zorzi<sup>2</sup>, Nicola Surian<sup>1</sup>, Paolo Campedel<sup>3</sup>, and Paolo Mozzi<sup>1</sup>

<sup>1</sup>Department of Geosciences, University of Padova, Via Gradenigo, 6, 35131, Padova, Italy

<sup>2</sup>Laboratory of Ion Beam Physics, Otto-Stern-Weg 5, ETH-Honggerberg, 8093, Zurich, Switzerland

<sup>3</sup>Servizio Geologico, Provincia autonoma di Trento, Via Zambra 42, 38122, Trento, Italy

<sup>4</sup>National Research Council, Institute of Geosciences and Earth Resources, Padova, Italy

**Correspondence:** Sandro Rossato (sandro.rossato@unipd.it)

**Abstract.** The “Masiere di Vedana” rock avalanche, located in the Belluno Dolomites (NE Italy) at the foot of the Mt. Peron, is re-interpreted as Historic on the base of archeological information and cosmogenic <sup>36</sup>Cl exposure dates. The deposit is 9 km<sup>2</sup> wide, has a volume of ~170 Mm<sup>3</sup> correspondings to a pre-detachment rock mass of ~130 Mm<sup>3</sup>, and a maximum runout distance of 6 km and an H/L ratio of ~0.2. Differential velocities of the rock avalanche moving radially over different topography and path-material lead to the formation of specific landforms (tomas and compressional ridges). In the Mt. Peron crown the bedding is subvertical and includes carbonate lithologies from lower Jurassic (Calcari Grigi Group) to Cretaceous (Maiolica) in age. The proximal deposit is made of Calcari Grigi Group limestone, the distal deposit comprises upper Jurassic limestones (Fonzaso Formation, Rosso Ammonitico, and Maiolica), while the middle Jurassic Vajont Limestone dominates the central sector of the deposit. In the release area the bedding, the SSE-vergent frontal thrust planes, the NW-vergent backthrust planes, the NW-SE fracture planes, and the N-S Jurassic fault planes controlled the failure and enhanced the rock mass fragmentation. Cosmogenic <sup>36</sup>Cl exposure ages, mean  $1.90 \pm 0.45$  ka, indicate failure occurred between 340 BC and 560 AD. Although abundant Roman remains were found in sites surrounding the rock avalanche deposit, none was found within the deposit, and this is consistent with a Late Roman or early Middle Age failure. Seismic and climatic drivers are discussed. Over the last few hundred years, earthquakes up to Mw 6.3 including that at 365 AD, affected the Belluno area. Early in the first millennium, periods of climate worsening with increasing rainfall are known in the NE Alps. The combination of climate and earthquakes induced progressive long-term damage to the rock. The present Mt. Peron crown shows hundreds of meters-high rock prisms bound by backwall trenches, suggesting a potential landslide hazard for the whole mountain belt north of Belluno affected by the same structural characteristics.

## 1 Introduction

Landslides have an enormous impact on landscapes and can be a serious threat to human lives and buildings. Assessment of the potential for future events is distinctly dependent on knowledge of the conditions under which past failures occurred in the

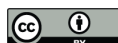

immediate vicinity (Samia et al., 2017). This entails detailed analysis and interpretation of driving factors as well as possible triggers of past events (Eisbacher and Clague, 1984; Nicoletti and Sorriso-Valvo, 1991; Hungr, 2006; Strom, 2006; Hermanns and Longva, 2012). Bedrock bedding, faults, fractures and other discontinuities predispose a rock to fail (Stead and Wolter, 2015). Damage accumulation in rock (fatigue) contributes to the location of failure (Friedmann et al., 2003; Brideau et al., 2009; Parker et al., 2013; Preisig et al., 2015), while seismic shakings (Keefer, 1993; Friedmann et al., 2003; Dunning et al., 2007; Cui et al., 2011) and periods of extreme rainfall (Guzzetti et al., 2008; Tsai and Wang, 2011; Loew et al., 2017; Preisig et al., 2015) can trigger landslides.

In this perspective, the Italian landslide inventory project (IFFI; Trigila et al., 2007; <http://www.progettoiffi.isprambiente.it/cartografia-on-line/>) is the ideal starting point for hazard maps. These are tools for landscape management and civil protection plans, they thus require continuous updating and accurate input data. In the study area (Fig. 1), the southern side of Mt. Peron (Belluno Dolomites, NE Italy) is classified in the most recent landslide hazard map (<http://www.geoviewer.isprambiente.it>) as “Attention Area” (i.e., a failure is possible, but an evaluation is needed). In 2011 a rockfall (volume ~1000 m<sup>3</sup>, blocks up to 2.5 m<sup>3</sup>) detached from the upper part of the Mt. Peron which led to commissioning the evaluation of the hazard along its southern cliff (Di Giusto, 2012). Numerous partially detached rock prisms were recognized, up to 18,000 m<sup>3</sup> and with trenches up to 50 cm wide. According to the author, nine out of 16 pillars are at risk for failure in case of an earthquake.

The IFFI catalog, the landslide hazard map and the evaluation by Di Giusto focused on the Mt. Peron southern wall and the scree slope, neglecting the deposit of Masiere di Vedana (Abele, 1974; Eisbacher and Clague, 1984; Pellegrini et al., 2006). This is also known as “Rovine di Vedana” (Mazzuoli, 1875; Squinabol, 1902; Montandon, 1933) or “Marocche di Vedana” (Dal Piaz, 1912; Venzo, 1939). The deposit covers an area of 8-9 km<sup>2</sup>, has a maximum thickness of 40 m and an estimated volume of 100-120 Mm<sup>3</sup> (Abele, 1974; Genevois et al., 2006; Pellegrini et al., 2006). The Masiere di Vedana is one of the largest catastrophic events in the Alps (Heim, 1932; Abele, 1974; Eisbacher and Clague, 1984), comparable with large events in the Himalaya (e.g., Hewitt, 2006; Hewitt et al., 2008; Mitchell et al., 2007), Rocky Mountains (e.g., Blais-Stevens et al., 2011; Charrière et al., 2016) and Andes (e.g., Hermanns et al., 2004; Welkner et al., 2010).

As there is no consensus on the age and dynamics of the Masiere di Vedana, a re-evaluation is needed in the light of hazard assessment. The Masiere di Vedana deposit was interpreted as: a glacial deposit (Hoernes, 1892), a landslide transported by a glacier during the Lateglacial (Mazzuoli, 1875; Squinabol, 1902; Dal Piaz, 1912; Venzo, 1939) and as the result of a catastrophic flood due to collapse of a natural dam (Taramelli, 1883). Some other authors proposed this deposit to be due to: (1) the combined effect of a landslide over a glacier, followed by a second landslide that evolved into a rock avalanche (Pellegrini, 2000; Pellegrini et al., 2006), and (2) a small rock slide followed by a larger rock avalanche (Genevois et al., 2006). The age attribution for the deposit ranges from the Lateglacial (Pellegrini et al., 2006) to historical times (Piloni, 1607; Miari, 1830).

The aim of this study is to provide chronology and to evaluate driving factors, potential triggers, and process dynamics of the Masiere di Vedana rock avalanche, in the light of a better assessment of the hazard, potential extent and runoff in similar settings.



## 2 Setting

The Masiere di Vedana lies at the mouth of the Cordevole Valley in a broad plain at the confluence of the Cordevole and Piave Rivers (Fig. 1). Mt. Peron (1486 m a.s.l.) is the south-western peak of the Schiara Group (highest peak: Mt. Schiara: 2565 m a.s.l.). The Mt. Peron is composed, from the west to the east, by Calcarei Grigi Group (Lower-Middle Jurassic), Vajont Limestone (Middle Jurassic), Fonzaso Formation, Rosso Ammonitico (Upper Jurassic) and Maiolica (Cretaceous) limestones. Their distinctive characteristics, useful for tracking the source of the Masiere di Vedana deposit, are: thick-bedded, fossiliferous blue-gray limestones (Calcarei Grigi Group); thick-bedded, locally oolitic limestones and calcarenites (Vajont Limestone); thick-bedded siliceous limestones with clay interbeds (Fonzaso Fm.); pink to red nodular limestones rich in ammonites (Rosso Ammonitico); thick-bedded, white limestones with chert nodules (usually gray to black) containing nannofossils, calpionellids and radiolaria (Maiolica). Scaglia Rossa and the Cenozoic formations (Belluno flysch, Belluno glauconitic sandstone, Bastia siltstone, Libano sandstone and Bolago marl) crop out at the base of the Piz Vedana (Fig. 3), form the Castel Cuch ridge and underlie the fluvial plain between the Mis and Cordevole rivers. Outcrops of cemented Pleistocene fluvial gravels (“Roe” or “Sass Muss conglomerate”; Costa et al., 1996) are located just to the west of the present course of the Cordevole River (near the town of Vignole in Fig. 3).

The investigated area is bound by Alpine tectonic lineaments (Fig. 1): the Valsugana thrust fault to the north, the S-verging Alpine folds and thrusts to the south (Doglioni, 1990). The Mt. Peron belongs to the hanging wall of the WSW-ENE oriented Belluno thrust, one of the main tectonic lineaments of the eastern Southern Alps (Doglioni, 1990; Galadini et al., 2005), that crops out at the northern limb of the Belluno syncline. The sedimentary strata of the forelimb are sub-vertical to slightly overturned (Doglioni, 1990; Costa et al., 1996) and they converge into the Belluno thrust. The Val Carpenada - Val di Vido - Val Madonuta thrust is the backthrust of the Belluno thrust (Costa et al., 1996). To the east, reactivated Jurassic faults (Masetti and Bianchin, 1987) displaced the Val Carpenada - Val di Vido - Val Madonuta thrust (Fig. 1) and induced a wealth of fractures in the Mt. Peron rock wall (Fig. 2). The Mt. Peron is at the nucleus of an ENE-WSW oriented anticline with a very steep forelimb, followed southwards by the Belluno syncline (Fig. 2a) that hosts Cenozoic sedimentary units (Costa et al., 1996).

## 3 Methods

### 3.1 Field survey, structural analysis and remote sensing

Detailed geomorphological maps (Caneve, 1985; De Zorzi, 2013), aerial and satellite images (Google Earth and Bing databases) and DTM analysis (cell size: 5 m, vertical accuracy: 30 cm; <http://idt.regione.veneto.it/app/metacatalog/>) were used to obtain topographic profiles and to estimate the area of the Masiere di Vedana deposit. The areal distribution of lithologies in the deposit was gauged by observation of boulders in the field and verified by thin section analysis (Supplementary Material SM1). Six boreholes, up to 3 m deep, were taken in the **fine sediments** of the Torbe area (Supplementary Material Figure SM2a) with a hand-auger (Edelman combination-type, Ejikelpkamp<sup>TM</sup>), which allows the extraction of 10 cm-wide cylindric cores.

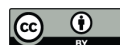

Orientations of bedrock discontinuities, such as bedding, foliation, joints, fractures and faults, were measured in the southern wall of Mt. Peron.

### 3.2 Cosmogenic $^{36}\text{Cl}$ exposure dating

Twelve different boulders located in topographically high positions with respect to the surroundings within the deposits were sampled for dating with cosmogenic  $^{36}\text{Cl}$ . For boulders VB13 (VB13a, VB13b) and VB14 (VB5 same boulder as VB14) two samples were taken. Samples were taken to cover the full extent of the deposit, from right near the source area to the distal sector.

For  $^{36}\text{Cl}$  sample preparation we used the method of isotope dilution as described by Ivy-Ochs et al. (2004). Total Cl and  $^{36}\text{Cl}$  were determined at the ETH AMS facility of the Laboratory for Ion Beam Physics (LIP) with the 6 MV tandem accelerator. The  $^{36}\text{Cl}/\text{Cl}$  ratios of the samples were normalized to the ETH internal standard K382/4N with a value of  $^{36}\text{Cl}/\text{Cl} = 17.36 \times 10^{-12}$  which is calibrated against the primary  $^{36}\text{Cl}$  standard KNSTD5000 (Christl et al., 2013; Vockenhuber et al., 2019). Full process chemistry blanks ( $3.4 \times 10^{-15}$ ) were subtracted from measured sample ratios. All fourteen rock samples were processed. Only seven were measured successfully due to too high  $^{36}\text{S}$ , also in relation to the very low  $^{36}\text{Cl}$  concentrations in these samples.

All measured data are presented here. Major and trace element concentrations were determined with XRF (Supplementary Material SM3) and ICP-MS (Supplementary Material SM4), respectively. We calculated surface exposure ages with the LIP ETH in-house MATLAB code based on the parameters presented in detail in Alfimov and Ivy-Ochs (2009, and references therein). A production rate of  $54.0 \pm 3.5$   $^{36}\text{Cl}$  atoms ( $\text{g Ca}^{-1} \text{ yr}^{-1}$ ), which encompasses a muon contribution at the rock surface of 9.6%; and a value of  $760 \pm 150$  neutrons ( $\text{g air}^{-1} \text{ yr}^{-1}$ ). These values are in excellent agreement with production rates recently published by Marrero et al. (2016). Production from all major elements and through low energy neutron capture in light of the trace elements (Supplementary Material Table SM4a) were fully considered. Production rates were scaled to the latitude, longitude, and altitude of the sites based on Stone (2000). No correction was made for karst weathering of the boulder surfaces (cf. Styllas et al., 2018). The extent of karst dissolution on the boulder surfaces varies significantly from boulder to boulder. Implementing a rate of 5 mm/ka would change the ages by less than 4%, which does not affect any of the conclusions drawn here. Stated errors of the exposure ages (Table 1) include both analytical uncertainties and those of the production rates (Alfimov and Ivy-Ochs, 2009). Two different surfaces of boulder 13 were analyzed (VB13a,  $1.45 \pm 0.12$ ; VB13b,  $1.45 \pm 0.12$  ka); the weighted mean of  $1.45 \pm 0.08$  ka is used for further discussion.

## 4 Results

### 4.1 Mt. Peron release area

The Mt. Peron scarp is 700 m wide and 600 m high, S-to-SW facing and partially circular. Numerous faults and fractures are well visible on the wall (Fig. 2b) and were grouped into five main discontinuity sets (Fig. 2c). These comprise: (1) bedding, (2) WSW-ENE directed frontal thrust planes, (3) NW vergent backthrust-related planes, (4) NW-SE aligned local conjugate

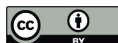

fracture planes sets, and (5) persistent N-S oriented planes interpreted as reactivated Jurassic faults (Masetti and Bianchin, 1987). Bedding is nearly vertical, its orientation ranges from 146/78 to 170/80 (dip direction/dip angle). The Belluno thrust, average orientation 337/64 (Costa et al., 1996), crops out at the base of the steep wall, whilst other Belluno thrust planes (295/53 to 340/67) were measured higher up along the wall (Fig. 2b). The NW-verging planes related to the backthrust are 111/15 to 175/54 and steepen to 80° at higher elevations along the wall. The NW-SE aligned fractures are 209/16 to 245/32 with an associated conjugate set, from 20/44 to 62/30, and nearly-vertical fractures with dip direction of 219 to 255. The N-S striking fracture planes dip both to the east (75/40 to 83/75) and to the west (240/71 to 299/18). Today myriad large and small individual rock prisms bound by these discontinuities are present at high elevation in the release area.

#### 4.2 Masiere di Vedana rock avalanche deposit

The deposit covers an area of ~9 km<sup>2</sup> from the base of Mt. Peron southwards to Roe Basse (~5 km) and westwards to Mis River (~3 km; Fig. 3). The thickness of the deposit is estimated ~10 m in the proximal area (near boulder VB2, Fig. 3), ~15 m in the central sector near Torbe, >30 m at the boundary between the Vedana and Masiere sectors, ~5 m in the Masiere central sector and ~15 m in the southern (distal) sector (Suppiei section, Fig. 4). Using a mean thickness of 20 m, a rough estimation of the total debris volume of ~170 Mm<sup>3</sup> is obtained. Such volume corresponds to a released rock mass of about 130 Mm<sup>3</sup> (bulking coefficient of 25% cf. Genevois et al., 2006). With a vertical drop (H) of about 1150 m (from the top of Mt. Peron: 1486 m a.s.l., to Roe Basse area: ~340 m a.s.l) and a travel distance (L) of about 5900 m (Fig. 3), we calculate an H/L ratio of ~0.2 (Fahrböschung angle of 11°). Based on spatial pattern, boulder lithology and morphological character, we distinguish five sectors of the deposit: Peron, Vedana, Torbe, Masiere and Roe (Roe Alte and Roe Basse).

The **Peron** sector includes the talus apron deposits at the foot of Mt. Peron, the rock avalanche deposits on the east side of the river and the terrace of the town of Peron (at about 380 m a.s.l.). Boulders at the foot of the slope range up to 20 m in diameter (Fig. 5a). Three boulders in the Peron sector were dated with cosmogenic <sup>36</sup>Cl (Fig. 3; Table 1): VB3a (Rosso Ammonitico; 1.83 ± 0.28 ka), VB3c (Fonzaso Fm.; 3.62 ± 0.41 ka) and VB14a (Calcari Grigi Group; 2.39 ± 0.39 ka). Based on the trend of all obtained ages, the age of VB3c is interpreted as an outlier, its age possibly reflecting the presence of inherited <sup>36</sup>Cl due to pre-exposure. The town of Peron lies on a terrace made of rounded gravel layers with rare sand lenses that are interfingered with talus deposits (Caneve, 1985).

In the **Vedana** sector, the rock avalanche deposit displays an irregular forested topography with relief on the order of tens of meters (Fig. 5b). Huge blocks hundreds of cubic meters in size, mostly made of Calcari Grigi, dominate the carapace. This covers the main body of the deposit made of shattered rocks, which is comprised of very angular clasts (up to tens of cm in diameter) in a matrix of silty sand. VB2 boulder (Calcari Grigi) gave an age of 1.49 ± 0.26 ka. In the Ponte Mas quarry (Figs. 3, 5g), an open section showed glacial till (up to 3 m thick) incorporated into the base of the rock avalanche deposit, its original bedding completely obliterated. This sediment is composed of sub-rounded clasts (up to 20 cm in length), some of them striated, supported by a silty clay matrix. Clasts are sedimentary and volcanic, reflecting the catchment of the Cordevole paleoglacier (cf. Pellegrini et al., 2006). Several ENE-WSW trending incisions cut through the Vedana and Torbe sectors (main

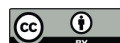

ones highlighted on Fig. 3). Irregular patches of sandy-silty and fine gravel sediments are found in the Vedana low-lying areas between the blocky reliefs.

The **Torbe** sector encompasses the distal northern lobe of the rock avalanche, characterized by 10 to 20-m high isolated hills and hummocks (Fig. 5d), “toma” (Turnau, 1906; Abele, 1974) that emerge from a flat topography. They are roughly aligned  
 155 ENE-WSW, circular at the base and have slope angles of 35°–40°. The toma are made of very angular Calcari Grigi boulders and clasts, with many jig-saw puzzle structures in a sandy, gravelly matrix (Fig. 5e). Six cores taken in the flat area between the hills (see Fig. 3 and Supplementary Material SM2) show up to two meters of fining upward silty sand above the rock avalanche. Torbe is crossed by the largest incision of the whole Masiere di Vedana (Fig. 3), ENE-WSW trending, ~50 m wide and up to 20 m deep in respect to the mean topographic surface. A shallower incision, few m deep, is located at the base of Piz Vedana  
 160 slope, still conveying a small amount of water coming from the Vedana Lake.

The **Masiere** sector is strikingly different from Vedana and Torbe. It is a bleak, vegetation-free, desert-like sea of limestone blocks, mainly of dolomitized Vajont Limestone (Fig. 5c). Boulders up to 3 m in diameter and abundant angular and sub-angular clasts, with almost no matrix, are present in the surficial part. In the southern part of Masiere, numerous 2-3 m high and up to 150 m long ridges, aligned roughly E-W, are present (Fig. 6). The contact of the rock avalanche with the underlying  
 165 Pleistocene conglomerate crops out near the southern boundary of the Masiere (white asterisk in Fig. 6). Next to the northern boundary of Masiere, the Cordevole River flows upon the Cenozoic rocks of the Castel Cuch ridge, covered elsewhere by the rock avalanche. An ENE-WSW trending shallow incision (Fig. 3) with associated well sorted, medium-to-coarse grained sandy deposits, is present, almost parallel to Castel Cuch. A roughly N-S trending incision, few meters deep, ~10 m wide and about 500 m long, is located just to the west of the Cordevole River. The town of Mas is built upon a flat terrace, mainly made of  
 170 sorted rounded gravels with a sandy matrix, that bounds the Masiere to the east.

**Roe Alte** and **Roe Basse** comprise the distal sector of the Masiere di Vedana to the south (Fig. 3), where angular clasts up to 20 cm in diameter and very few boulders immersed in a sandy matrix are scattered in the meadows. Boulders belong to the Fonzaso Formation, Rosso Ammonitico and Maiolica, very few of them made of Vajont Limestone. Roe Basse is made of silty/sandy alluvial sediments deposited by the Gresal and other minor streams coming from the east, mantling the rock  
 175 avalanche deposit on the northwestern side. The Suppiei section, 100-m-long and 25-m-high, on the left flank of the Cordevole River (Figs. 3, 5h; Supplementary Material SM5), shows the Bolago Marl unconformably overlain by 0.5-2 m of glacial till. This is in turn covered, with a sharp and undulated contact, by up to 20 m of rock avalanche debris decimetric in size, with boulders (~1 m diameter) on top. On the Roe Alte rocky upland, the rock avalanche is at most 2 meters thick, with rare boulders (1-2 m diameter). Two boulders made of Vajont Limestone (Fig. 3) have been dated with  $^{36}\text{Cl}$  (VB12,  $2.35 \pm 0.21$  ka; VB13,  
 180  $1.45 \pm 0.08$  ka; Table 1). South of the town of Mas, the Cordevole River flows into narrow meanders entrenched ~20 m into rock avalanche deposits, alluvial material, glacial sediments and bedrock. The terrace of the Vignole village is almost totally made of rock avalanche debris, despite being remarkably flat.



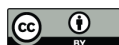

## 5 Interpretation and discussion

### 5.1 Age of the Mt. Peron rock avalanche

<sup>36</sup>Cl surface exposure ages from boulders all across the deposit range from  $1.45 \pm 0.08$  ka to  $2.39 \pm 0.38$  ka (Table 1). All ages show a good overlapping within uncertainties. A single sample (VB3c) gave a result markedly different from the others:  $3.62 \pm 0.41$  ka. Although this age may point to pre-exposure of the sampled boulder surface (cf. Sewell et al., 2006; Merchel et al., 2013), as for example seen at Lavini di Marco (Martin et al., 2014), the possibility exists that this boulder is part of a partially buried older deposit located right at the foot of Mt. Peron. The poorly developed karst dissolution features (0.5-1 cm deep karren) on the tops of many boulders suggest as well that the deposit is relatively young. The average of <sup>36</sup>Cl ages, excluding Vb3c as an outlier, is  $1.90 \pm 0.45$  ka. The uncertainty of the mean is based on the cumulative probability of uncertainties for all samples based on a Gaussian probability distribution (one sigma level). Such a value indicates that the rock avalanche, considering the error range, occurred during historical times, between 340 BC and 560 AD. These results are in stark contrast to previous reconstructions, which pointed to a Lateglacial age (Mazzuoli, 1875; Hoernes, 1892; Squinabol, 1902; Dal Piaz, 1912; Venzo, 1939; Genevois et al., 2006; Pellegrini et al., 2006). The date 1113, 1114, 1117 AD proposed for the main landslide event suggested by some authors (Piloni, 1607; Miari, 1830) may be associated to the Verona earthquake at 1117 AD. That event was clearly felt in the Belluno area, where it did cause several rockfalls (Guidoboni et al., 2005), but its age is not consistent with the cosmogenic dates on the Masiere di Vedana. To search for independent constraints for the age of the main landslide event, a detailed research in numerous archives and chronicles was undertaken. This area during Roman time was largely and uniformly inhabited by “incolae” for agricultural aims, being the area located next to the Claudia Augusta Altinate road connecting Feltre with Belluno (Fig. 1) (Alpago-Novello, 1957, 1988). The presence of a Roman bridge crossing the Cordevole River north of the Mt. Peron indicates there was a connection to the main Claudia Augusta Altinate road. While numerous archeological Neolithic and Roman sites are reported around the Masiere di Vedana (Capuis et al., 1988; Frassine et al., 2016), no Roman or pre-Roman archaeological remains have been found within the rock avalanche deposits (Fig. 3). If the Masiere di Vedana deposit was settled after Roman times, previous settlements eventually located in the area would have been buried by the event. The oldest record for the post-event human presence is a hospice built in the 12<sup>th</sup> century AD (1155 AD; Magoga and Marin, 1998) on the fluvial terrace near the village of S. Gottardo (Fig. 3). Therefore, historical data indicate a time frame between Roman times and the Middle Ages.

The age uncertainties do not allow to directly determine if the Masiere di Vedana deposit was due to a single failure or multiple events. The distribution of the available dates has no spatial pattern across the deposit, no physical boundaries occur, no buried soil layers have been found within the deposits. Moreover, the runout of the landslide indicates a single huge catastrophic event. Therefore, a single rock avalanche occurred in historical time contradicting previous interpretations (e.g., Genevois et al., 2006; Pellegrini et al., 2006) and asking for a re-evaluation of the landslide hazard.



## 5.2 Release, emplacement and post-event modification of the deposit

215 A schematic reconstruction of the reach of the Cordevole Valley involved in the rock avalanche can be depicted before, during and after the event. Before the rock avalanche, the Cordevole River flowed through a gentle rolling landscape along the foot of Piz Vedana and through a breach cutting the Castel Cuch bedrock ridge just north of the village of Mas (Figs. 3, 7a). Topographic highs, like Castel Cuch and Roe Alte, were at that time mantled with glacial sediments attributable to the last glaciation.

220 The rock avalanche involved the detachment of about 130 Mm<sup>3</sup> from the southern face of Mt. Peron. Initial movement was a sliding along the NW vergent backthrust-related planes (Fig. 2). En bloc movement may have been only briefly sustained as the pervasive network of fractures favored a massive collapse. The rock mass immediately evolved into a rock avalanche whose volume grown by fragmentation up to 170 Mm<sup>3</sup> and spread out onto the flat plain below. The H/L of ~0.2 (apparent friction angle of 11°) marks the Mt. Peron event as extremely mobile, for example in comparison to the Fernpass rock avalanche which  
 225 has a H/L of 0.9, a volume 1 km<sup>3</sup> and a significantly longer runout distance of 15.5 km (Prager et al., 2009). It may be possible to glean information about the failure style from the distribution of boulder lithologies, which follows the stratigraphic order of the bedrock exposed in the source area and has been as well noted at the Tschirgant rock avalanche deposits in Austria (Dufresne et al., 2016) and the Frank slide in Canada (Charrière et al., 2016). In the Mt. Peron bedrock, the lithologic sequence from west to east is: Calcari Grigi Group, Vajont Limestone, Fonzaso Fm., Rosso Ammonitico and Maiolica. This pattern is  
 230 mirrored in the deposits (Figs. 3, 4): Vedana and Torbe are dominated by Calcari Grigi Group, Masiere by Vajont Limestone and Roe by Fonzaso Fm., Rosso Ammonitico and Maiolica. Experiments and modelling suggest that this kind of zonation is likely to occur when the sliding mass propagates as a flexible sheet, with laminar flow (Friedmann et al., 2006).

Several landforms within the Masiere di Vedana provide further clues on the processes of propagation and emplacement. The tomas in the Torbe sector suggest differential velocities in the moving mass propagating on a water-saturated substrate  
 235 (Strom, 2006; Prager et al., 2009; Dufresne, 2012; Dufresne et al., 2016; Aaron et al., 2017). Tomas, with likely similar origin, are present in the distal deposits at Fernpass in Tyrol (Prager et al., 2009) and at Flims (von Poschinger and Ruegg, 2012). Recently, More and Wolkersdorfer (2019) proposed for the Toma Hills at Fernpass an alternative origin from internal erosion by suffusion. However, at Masiere di Vedana the fluvial deposition above the rock avalanche suggests that suffusion process can be ruled out. In contrast to the increased mobility seen in the Torbe sector, in the central Masiere area, landforms indicative  
 240 of stalling are present (Fig. 6). The stacked sub-parallel transverse ridges, much like those noted at Tschirgant (Patzelt, 2012; Dufresne et al., 2016; Ostermann et al., 2017), with slight overrunning of the ridges in front by those behind, indicate slowing down of the moving mass due to longitudinal compression (Nicoletti and Sorriso-Valvo, 1991; Dunning et al., 2005; Strom, 2006; Dufresne et al., 2016). Outcrop relationships (Fig. 6) suggest that the **Pleistocene conglomerate** inhibited the rock mass flow, in combination with the slight uphill gradient. The ridges at Masiere were previously interpreted as neotectonic lineaments  
 245 by Baggio and Marcolongo (1984).

After the event, the Cordevole River changed its channel several times. The rock avalanche blocked the river, creating accommodation space to the north, where possibly a temporary lake formed. The river was then forced to flow westward





across the deposit as indicated by the paleochannels in the Vedana and Torbe sectors (black arrows, Fig. 3), taking different paths at different times. Low-lying areas were progressively filled, as shown by the fining upwards sequence recorded in core TB1 (Supplementary Material Figure SM2a). The Torbe, Vedana and Peron terrace are flat surfaces at ~380 m a.s.l. (Fig. 7b). Afterwards, a further sedimentation was hindered by the trenching in Torbe. The Cordevole river finally breached the landslide deposit to the southeast, through the Castel Cuch ridge made of Cenozoic rocks (Fig. 7a). The river initially flowed from Mas (about 375 m a.s.l.; green line in Fig. 7a) to the southern flank of Castel Cuch as suggested by the still recognizable paleochannel (Fig. 3) filled with well sorted, medium- to coarse-grained sand (Caneve, 1985). Subsequently, the Cordevole moved to the eastern side of the Pleistocene conglomerate cliff (Fig. 3). The final diversion of the river formed the Peron, Mas and Vignole terraces and currently flows some meters below with upstream migration of the knickpoint (Fig. 7).

### 5.3 Driving factors and possible future hazards

In the Cordevole and Piave Valleys many landslides have been recorded (Fig. 8) and have caused a great deal of damage and casualties (Rossato et al., 2018). Moreover, rock avalanches such as Masiere di Vedana are difficult to predict (Hungr, 2006) and may be very destructive due to their huge volume and extreme runout (Guzzetti, 2000; Hungr, 2004; Geertsema et al., 2006; Evans et al., 2007; Sosio et al., 2008; Cui et al., 2011; Hermanns and Longva, 2012). In the light of the results we obtained, the search for the drivers of the Masiere di Vedana rock avalanche is both timely and imperative. Even if what determines the moment of failure may be difficult to pinpoint, increased pore pressure and seismic ground shaking are primary candidates in such cases (Wieczorek, 1996; Schuster and Wieczorek, 2002; Takahashi, 2001). However, rock avalanches may start without a definite trigger, as for example the Tsatichhu landslide (10<sup>th</sup> September 2003) in Bhutan (Dunning et al., 2006) and the several Randa events (total of 30 Mm<sup>3</sup>) in 1991 in Switzerland (Loew et al., 2012). Failure normally occurs when in the rock mass resisting forces weaken till the driving forces overcome them (factor of safety  $\leq 1$ ; Glade and Crozier, 2005).

The Belluno area has a high mean annual rainfall (1643 mm in the time interval 1994-2018 at <https://www.arpa.veneto.it/dati-ambientali/open-data>) and is prone to extreme rainfall events (e.g., >300 mm of rain at Sospirolo during a single event: 27<sup>th</sup> October – 1<sup>st</sup> November 2018; ARPAV, 2018). Moreover, at the time of the Masiere di Vedana rock avalanche, soon after the beginning of the Christian Era, the eastern European Alps and NE Italy were affected by various periods of climate degradation during which several extreme meteorological events occurred (Wirth et al., 2013; Rossato et al., 2015). One of these extreme events had an impact all over Europe between 50 and 250 AD, with marked intensity and widespread flooding recognizable in the stratigraphic records (Macklin et al., 2006; Benito et al., 2015; Rossato et al., 2015). This event of severe rainfall could be a possible trigger for the Masiere di Vedana rock avalanche or, at least may have acted as a driving and destabilizing factor. Likewise, the Val Pola rock avalanche in the central Alps was triggered by a period of exceptional rainfall (Crosta et al., 2004).

The Veneto region is prone to earthquake activity and is categorized as level 2 seismic hazard (“possible strong earthquakes” in Ordinanza del PCM n. 3519/2006), as the historical record testifies (up to ~Mw=6.5; Vigano` et al., 2013, 2015; Rovida et al., 2016). Continuous instrumental monitoring of the Belluno area dates back only to 1977 (Sandron et al., 2014), preceding cataloged major seismic events in the region are based on either historical chronicles, dated building damages and/or observed rockfalls (Piloni, 1607; Taramelli, 1883; Guidoboni et al., 2005, 2018). Within a radius of 30 km from Mt. Peron, eight



earthquakes with  $M_w$  greater than 5.0, and one exceeding 6.0, are listed (Fig. 1). The strongest ( $M_w = 6.3$ ) in the nearby area, occurred just 20 km to the east of Mt. Peron on 29<sup>th</sup> June 1873 (Rovida et al., 2016, and references therein). Severe damages to Belluno city were reported during the Asolo (25<sup>th</sup> February 1695 AD;  $M_w=6.4$ ) and Verona (3<sup>rd</sup> January 1117;  $M_w=6.5$ ) earthquakes whose epicenters were located, respectively, 60 and 140 km away. As for the time frame suggested by our chronology, historical records report an important seismic event at July 365 AD with damages to the city of Belluno (Piloni, 1607). These data suggest that the Belluno area is sensitive to seismic shakings originating even hundreds of km away. In the Alps, earthquakes have been suggested as triggers for several rock avalanches (e.g., Grämiger et al., 2016; Ivy-Ochs et al., 2017; Köpfli et al., 2018). The most important effect of the frequent seismic activity is the progressive increase in the rock fatigue, with the formation and subsequent weathering of failure planes (Friedmann et al., 2003; Brideau et al., 2009; Parker et al., 2013; Preisig et al., 2015; Gischig et al., 2016). Where these intersect, rock dissolution and the formation of caves is favored (Filipponi et al., 2009; Sauro et al., 2013), further weakening the mechanical properties of rocks (Pánek et al., 2009; Gutierrez et al., 2014). The Mt. Peron southern wall is known locally as the "weeping rock" due to the numerous caves and karst springs along the steep rock face (Fig. 2b).

In a general view, active tectonics and related accumulated fatigue have been suggested to contribute to intensification of slope instability registered in the Belluno Dolomites during the last 1500 yr (Galadini et al., 2005). The Belluno Dolomites experienced a long deformation history since the Miocene, related to regional-scale stress connected to the counter-clockwise rotation of the Adria plate, indented with the Alpine orogeny (Márton et al., 2003; D'Agostino et al., 2008). Such forces overturned the bedding, formed the thrusts and backthrusts (WSW-ENE oriented), the two conjugate fracture sets (NW-SE oriented) and led to re-activation of the Jurassic faults (N-S oriented). The belt characterized by these deformations lies between the Belluno thrust and the Val Carpenada - Val di Vido - Val Madonuta backthrust (Fig. 1), and extends from the Piave Valley to the east to the Caorame Valley to the west (Bosellini et al., 1981; Masetti and Bianchin, 1987; Bigi et al., 1990; Costa et al., 1996, Fig. 1).

Similar to the Mt. Peron, the entire belt may produce huge landslide events. Mt. Tre Pietre (1965 m a.s.l.), Mt. Pizzocco (2186 m a.s.l.) and Mt. Serva (2133 m a.s.l.) are higher than Mt. Peron (1486 m a.s.l.), with densely inhabited areas at their foothills (Figs. 1, 9), and deserve focused hazard evaluation. The Piz Vedana (1324 m a.s.l.) should be mentioned as well, because even if lower than the other peaks, it looms over the artificial Lake Mis (Fig. 3). A massive rock failure that would hit the lake or damage the dam may pose a serious threat, possibly triggering a tsunami, as happened for instance at Vajont (e.g., Borgatti et al., 2004).

## 6 Conclusions

Data acquired in this study cast new light on the timing, failure and propagation of the Masiere di Vedana rock avalanche and the potential risk from the Mt. Peron rock wall and surrounding area. The rock avalanche ( $\sim 130 \text{ Mm}^3$ ) detached from the southern slope of the Mt. Peron. The deposit extends over an area of  $9 \text{ km}^2$ , with a total volume of  $\sim 170 \text{ Mm}^3$ . A H/L ratio  $\sim 0.2$  is calculated, marking it as extremely mobile, which is also shown by the maximum runout of 6 km. Geomorphological,



315 stratigraphic and historical evidence when combined with cosmogenic  $^{36}\text{Cl}$  exposure ages, mean age  $1.90 \pm 0.45$  ka, point to  
 a single event that occurred in or after late Roman times but before the Middle Ages.

The steep rock wall on the south face of Mt. Peron shows a pervasive deformation; numerous fractures and faults cross-cut  
 the sub-vertical to slightly overturned carbonate Mesozoic bedrock. The WSW-ENE directed backthrust planes, which are the  
 most continuous ones, constituted the planes along which the rock mass initially slid, rapidly breaking-up and evolving into a  
 320 rock avalanche.

The stratigraphic sequence is preserved in the rock avalanche deposit. Lithologies that presently constitute the western part  
 of the source area, were deposited in the proximal sectors (Vedana, Torbe), while the more easterly outcropping ones reached  
 the distal areas (Masiere, Roe Alte). Landforms of the deposit suggest differential velocities during emplacement. In the NW  
 sector (Torbe) enhanced mobility likely due to interaction with water-saturated path material is evidenced by the numerous  
 325 ENE-WSW aligned tomas. In contrast, in the middle sector (Masiere) stacked transverse ridges point to stalling, perhaps  
 related to the gentle uphill gradient and impeded propagation over Pleistocene conglomerates. Post-event evolution comprises  
 formation of backwater alluvial terraces and the wandering of the Cordevole River in the rock avalanche deposits, with incision  
 and aggradation phases.

Identified pivotal drivers are the overall structural setting, exceptional rainfall events and seismic shakings. Their com-  
 330 bination produced a pervasive fracturation and weathering of the rock mass, with progressive increase of rock fatigue. No  
 exceptional event may actually be required for such rock avalanches to occur, as accumulation of damage markedly lowers the  
 energy needed to trigger failure.

Today, in the area between the Belluno thrust and its backthrusts from the Caorame to the Piave Valleys, the hazard for the  
 failures of large blocks, prisms or larger rock volumes needs re-evaluation. The occurrence of a huge event like the Masiere di  
 335 Vedana rock avalanche has to be considered.

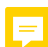

*Data availability.* All data are in the paper or in the supplemental material.

*Author contributions.* All authors contributed to discussion, field survey, data collection and improving the text, that has been written mostly  
 by S. Rossato, S. Ivy-Ochs, S. Martin and G. Monegato. Each author contributed to different parts, here listed: geomorphology: S. Rossato,  
 S. Ivy-Ochs, G. Monegato, M. De Zorzi, N. Surian, P. Mozzi; geological and structural analysis: S. Martin, A. Viganò, P. Campedel; remote  
 340 sensing and GIS elaborations: S. Rossato; dating: S. Ivy-Ochs, C. Vockenhuber; thin sections analysis: M. Rigo.

*Competing interests.* The authors declare that no competing interests are present.

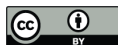

*Acknowledgements.* The Ion Beam Physics group at ETH Zurich is thanked for support of field work, laboratory work and AMS measurements. Drs. Andrea Cuman and Livio Ronchi are thanked for their support in the early phases of the research. The research was partially funded by University of Padova (Progetto di ricerca di Ateneo 2014, CPDA140511).



## 345 References

- Aaron, J., McDougall, S., Moore, J. R., Coe, J. A., and Hungr, O.: The role of initial coherence and path materials in the dynamics of three rock avalanche case histories, *Geoenviron. Disasters*, 4, 5, <https://doi.org/10.1186/s40677-017-0070-4>, 2017.
- Abele, G.: *Bergstürze in den Alpen. Ihre Verbreitung, Morphologie und Folgeerscheinungen*, Wiss. Alpenvereinshefte 25, Munchen, 1974.
- Aldighieri, B., Testa, B., and Bertini, A.: 3D exploration of the San Lucano Valley: virtual geo-routes for everyone who would like to  
 350 understand the landscape of the Dolomites, *Geoheritage*, 8, 77-90, <https://doi.org/10.1007/s12371-015-0164-x>, 2016.
- Alfimov, V., and Ivy-Ochs, S.: How well do we understand production of <sup>36</sup>Cl in limestone and dolomite?, *Quat. Geochronol.*, 4(6), 462-474, <https://doi.org/10.1016/j.quageo.2009.08.005>, 2009.
- Alpago-Novello, L.: Resti di Centuriazione Romana nella Val Belluna, *Atti Accad. Naz. Lin.*, 12, 5-6, 1957.
- Alpago-Novello, L.: Aggiornamenti sulla centuriazione romana della Val Belluna, *Bellunates, Catubri, Feltrini*, 267, 117-142, 1988.
- 355 ARPAV: Technical report on the 27/10/2018 – 01/11/2018 meteorological event, available at: [https://www.regione.veneto.it/c/document\\_library/get\\_file?uuid=094022ae-43e7-46b1-86d2-ff3ebf669b89&groupId=90748](https://www.regione.veneto.it/c/document_library/get_file?uuid=094022ae-43e7-46b1-86d2-ff3ebf669b89&groupId=90748), 2018.
- Baggio, P., and Marcolongo, B.: Contributo del telerilevamento alla conoscenza della sinclinale di Belluno. Il modello neotettonico derivato, in: *Atti A.I.T.A.: Esperienze e Prospettive del telerilevamento*, Bari, Italy, 9-11 May 1984, 707-736, 1984.
- Benito, G., Macklin, M. G., Panin, A., Rossato, S., Fontana, A., Jones, A. F., Machado, M. J., Matlakhova, E., Mozzi, P., and  
 360 Zielhofer, C.: Recurring flood distribution patterns related to short-term Holocene climatic variability, *Sci. Rep.-UK*, 5, 16398, <https://doi.org/10.1038/srep16398>, 2015.
- Blais-Stevens, A., Hermanns, R. L., Jermyn, C.: A <sup>36</sup>Cl age determination for Mystery Creek rock avalanche and its implications in the context of hazard assessment, *British Columbia, Canada, Landslides*, 8, 407-416, <https://doi.org/10.1007/s10346-011-0261-0>, 2011.
- Bigi, G., Cosentino, D., Parotto, M., Sartori, R., and Scandone, P.: Structural model of Italy, scale 1: 500,000, CNR, Progetto Finalizzato  
 365 Geodinamica, Firenze, Italy, 1990.
- Borgatti, L., and Soldati, M.: Landslides as a geomorphological proxy for climate change: A record from the Dolomites (northern Italy), *Geomorphology*, 120 (1-2), 56-64, <https://doi.org/10.1016/j.geomorph.2009.09.015>, 2010.
- Borgatti, L., Soldati, M., Carton, A., Corsini, A., Galuppo, A., Ghinai, A., Marchetti, M., Oddone, E., Panizza, M., Pasuto, A., Pellegrini, G. B., Schiavon, E., Siorpaes, C., Surian, N., and Tagliavini, F.: Geomorphology and slope instability in the Dolomites (Northern Italy): from  
 370 Lateglacial to recent geomorphological evidence and engineering geological applications, *Mem. Descr. Carta Geol. d'It.*, 63(4), 1-52, 2004.
- Bosellini, A., Masetti, D., and Sarti, M.: A Jurassic “Tongue of the ocean” infilled with oolitic sands: the Belluno Trough, Venetian Alps, Italy, *Mar. Geol.*, 44 (1-2), 59-95, [https://doi.org/10.1016/0025-3227\(81\)90113-4](https://doi.org/10.1016/0025-3227(81)90113-4), 1981.
- Brideau, M. A., Yan, M., and Stead, D.: The role of tectonic damage and brittle rock fracture in the development of large rock slope failures,  
 375 *Geomorphology*, 103(1), 30-49, <https://doi.org/10.1016/j.geomorph.2008.04.010>, 2009.
- Caneve, L.: *Geomorfologia delle “Marocche” di Vedana nel Vallone Bellunese*, master thesis, University of Padova, Italy, 1985.
- Capuis, L., Leonardi, G., Pesavento Mattioli, S., and Rosada, G. (Eds.): *Carta Archeologica del Veneto 1:100,000*, Panini, Modena, 1988.
- Charrière, M., Humair, F., Froese, C., Jaboyedoff, M., Pedrazzini, A., and Longchamp, C.: From the source area to the deposit: Collapse, fragmentation, and propagation of the Frank Slide, *Geol. Soc. Am. Bull.*, 128 (1-2), 332-351, <https://doi.org/10.1130/B31243.1>, 2016.
- 380 Christl, M., Vockenhuber, C., Kubik, P. W., Wacker, L., Lachner, J., Alfimov, V., and Synal, H. A.: The ETH Zurich AMS facilities: Performance parameters and reference materials, *Nucl. Instrum. Meth. B*, 294, 29-38, <https://doi.org/10.1016/j.nimb.2012.03.004>, 2013.



- Costa, V., Doglioni, C., Grandesso, P., Masetti, D., Pellegrini, G. B., and Tracanella, E.: Note illustrative della Carta geologica d'Italia alla scala 1: 50,000: Foglio 063 - Belluno, Istituto Poligrafico e Zecca dello Stato, Roma, Italy, 1996.
- Crosta, G. B., Chen, H., and Lee, C. F.: Replay of the 1987 Val Pola landslide, Italian Alps, *Geomorphology*, 60 (1-2), 127-146, <https://doi.org/10.1016/j.geomorph.2003.07.015>, 2004.
- Cui, P., Chen, X. Q., Zhu, Y. Y., Su, F. H., Wei, F. Q., Han, Y. S., Liu, H. J., and Zhuang, J. Q.: The Wenchuan earthquake (May 12, 2008), Sichuan province, China, and resulting geohazards, *Nat. Hazards*, 56 (1), 19-36, <https://doi.org/10.1007/s11069-009-9392-1>, 2011.
- D'Agostino, N., Avallone, A., Cheloni, D., D'Anastasio, E., Mantenuto, S., and Selvaggi, G.: Active tectonics of the Adriatic region from GPS and earthquake slip vectors, *J. Geophys. Res.*, 113, B12413, <https://doi.org/10.1029/2008JB005860>, 2008.
- Dal Piaz, G.: Studi geotettonici sulle Alpi orientali: regione fra il Brenta e i dintorni del lago di Santa Croce, *Mem. Ist. Geol. R. Univ. Padova*, 1, 1-195, 1912.
- De Zorzi, M.: The Peron Mount rock avalanche: 36Cl exposure age dating, master thesis, University of Padova, Italy, 2013.
- Di Giusto, M.: Pericolosità indotta dalla caduta massi dal Monte Peron - Valutazione geologica, Technical evaluation for the municipality of Peron, Belluno, Italy, 2012.
- Doglioni, C.: The global tectonic pattern, *J. Geodyn.*, 12 (1), 21-38, [https://doi.org/10.1016/0264-3707\(90\)90022-M](https://doi.org/10.1016/0264-3707(90)90022-M), 1990.
- Dufresne, A.: Granular flow experiments on the interaction with stationary runout path materials and comparison to rock avalanche events, *Earth Surf. Proc. Land.*, 37 (14), 1527-1541, <https://doi.org/10.1002/esp.3296>, 2012.
- Dufresne, A., Prager, C., and Bösmeier, A.: Insights into rock avalanche emplacement processes from detailed morpho-lithological studies of the Tschirgant deposit (Tyrol, Austria), *Earth Surf. Proc. Land.*, 41 (5), 587-602, <https://doi.org/10.1002/esp.3847>, 2016.
- Dunning, S. A., Mitchell, W. A., Rosser, N. J., and Petley, D. N.: The Hattian Bala rock avalanche and associated landslides triggered by the Kashmir Earthquake of 8 October 2005, *Eng. Geol.*, 93 (3), 130-144, <https://doi.org/10.1016/j.enggeo.2007.07.003>, 2007.
- Dunning, S. A., Petley, D. N., Rosser, N. J., and Strom, A. L.: The morphology and sedimentology of valley confined rock-avalanche deposits and their effect on potential dam hazard, in: *Proceedings of the International Conference on Landslide Risk Management*, edited by: Hungr, O., Fell, R., Couture, R., and Eberhardt, E., Taylor and Francis, Balkema, London, UK, 691-701, <https://doi.org/10.1201/9781439833711>, 2005.
- Dunning, S. A., Rosser, N. J., Petley, D. N., and Massey, C. R.: Formation and failure of the Tsatichhu landslide dam, Bhutan, *Landslides*, 3 (2), 107-113, <https://doi.org/10.1007/s10346-005-0032-x>, 2006.
- Eisbacher, G. H., and Clague, J. J.: Destructive mass movements in high mountains: hazard and management, Geological Survey of Canada, Vancouver, British Columbia, Canada, 1984.
- Ermini, L., and Casagli, N.: Prediction of the behaviour of landslide dams using a geomorphological dimensionless index, *Earth Surf. Proc. Land.*, 28 (1), 31-47, <https://doi.org/10.1002/esp.424>, 2003.
- Evans, S. G., Guthrie, R. H., Roberts, N. J., and Bishop, N. F.: The disastrous 17 February 2006 rockslide-debris avalanche on Leyte Island, Philippines: a catastrophic landslide in tropical mountain terrain, *Nat. Hazard Earth Sys.*, 7 (1), 89-101, <https://doi.org/10.5194/nhess-7-89-2007>, 2007.
- Filipponi, M., Jeannin, P. Y., and Tacher, L.: Evidence of inception horizons in karst conduit networks, *Geomorphology*, 106 (1-2), 86-99, <https://doi.org/10.1016/j.geomorph.2008.09.010>, 2009.
- Frassine, M., Naponiello, G., De Francesco, S., and Asta, A.: RAPTOR 1.5. Aggiornamenti e sperimentazione, in: *ArcheoFOSS. Free, Libre and Open Source Software e Open Format nei processi di ricerca archeologica*, Atti del IX Workshop (Verona, 19-20 giugno 2014), edited by: Basso, P., Caravale, A., and Grossi, P., *Archeol. Calc., Suppl.* 8., 61-71, 2016.





- 420 Friedmann, S. J., Kwon, G., and Losert, W.: Granular memory and its effect on the triggering and distribution of rock avalanche events, *J. Geophys. Res.-Sol. Ea.*, 108 (B8), <https://doi.org/10.1029/2002JB002174>, 2003.
- Friedmann, S. J., Taberlet, N., and Losert, W.: Rock-avalanche dynamics: insights from granular physics experiments, *Int. J. Earth Sci.*, 95 (5), 911-919, <https://doi.org/10.1007/s00531-006-0067-9>, 2006.
- Galadini, F., Poli, M. E., and Zanferrari, A.: Seismogenic sources potentially responsible for earthquakes with  $M \geq 6$  in the eastern Southern Alps (Thiene-Udine sector, NE Italy), *Geophys. J. Int.*, 161 (3), 739-762, <https://doi.org/10.1111/j.1365-246X.2005.02571.x>, 2005.
- 425 Geertsema, M., Clague, J. J., Schwab, J. W., and Evans, S. G.: An overview of recent large catastrophic landslides in northern British Columbia, Canada, *Eng. Geol.*, 83 (1), 120-143, <https://doi.org/10.1016/j.enggeo.2005.06.028>, 2006.
- Genevois, R., Armento, C., and Tecca, P. R.: Failure mechanisms and runout behaviour of three rock avalanches in the north-eastern Italian Alps, in: *Landslides from Massive Rock Slope Failure*, edited by: Evans, S. G., Mugnozza, G. S., Strom, A., and Hermanns, R. L., NATO
- 430 Sci. S., 49, 407-427, [https://doi.org/10.1007/978-1-4020-4037-5\\_22](https://doi.org/10.1007/978-1-4020-4037-5_22), 2006.
- Gischig, V., Preisig, G., and Eberhardt, E.: Numerical investigation of seismically induced rock mass fatigue as a mechanism contributing to the progressive failure of deep-seated landslides, *Rock Mech. Rock Eng.*, 49(6), 2457-2478, <https://doi.org/10.1007/s00603-015-0821-z>, 2016.
- Glade, T., and Crozier, M. J.: The nature of landslide hazard impact, in: *Landslide hazard and risk*, edited by: Glade, T., Anderson, M., and
- 435 Crozier, M. J., Wiley, New York, 43-74, <https://doi.org/10.1002/9780470012659.ch2>, 2005.
- Grämiger, L. M., Moore, J., Vockenhuber, C., Aaron, J., Hajdas, I., and Ivy-Ochs, S.: Two early Holocene rock avalanches in the Bernese Alps (Rinderhorn, Switzerland), *Geomorphology*, 268, 207-221, <https://doi.org/10.1016/j.geomorph.2016.06.008>, 2016.
- Guidoboni, E., Comastri, A., and Boschi, E.: The “exceptional” earthquake of 3 January 1117 in the Verona area (northern Italy): a critical time review and detection of two lost earthquakes (lower Germany and Tuscany), *J. Geophys. Res.-Sol. Ea.*, 110 (B12),
- 440 <https://doi.org/10.1029/2005JB003683>, 2005.
- Guidoboni, E., Ferrari, G., Mariotti, D., Comastri, A., Tarabusi, G., Sgattoni, G., and Valensise, G.: CFTI5Med, Catalogo dei Forti Terremoti in Italia (461 a.C.-1997) e nell’area Mediterranea (760 a.C.-1500), Istituto Nazionale di Geofisica e Vulcanologia (INGV), <https://doi.org/10.6092/ingv.it-cfti5>, 2018.
- Gutierrez, F., Parise, M., DeWaele, J., and Jourde, H.: A review on natural and human-induced geohazards and impacts in karst, *Earth-Sci. Rev.*, 138, 61-88, <https://doi.org/10.1016/j.earscirev.2014.08.002>, 2014.
- 445 Guzzetti, F.: Landslide fatalities and the evaluation of landslide risk in Italy, *Eng. Geol.*, 58 (2), 89-107, [https://doi.org/10.1016/S0013-7952\(00\)00047-8](https://doi.org/10.1016/S0013-7952(00)00047-8), 2000.
- Guzzetti, F., Peruccacci, S., Rossi, M., and Stark, C. P.: The rainfall intensity-duration control of shallow landslides and debris flows: an update, *Landslides*, 5 (1), 3-17, <https://doi.org/10.1007/s10346-007-0112-1>, 2008.
- 450 Heim, A.: *Bergsturz und Menschenleben*, Vierteljahrschr. Naturf. Ges. Zu’rich, 20, Beer and Co., Zurich, Switzerland, 1932.
- Hermanns, R. L., and Longva, O.: Rapid rock-slope failures, in: *Landslides (types, mechanisms and modeling)*, edited by: Clague, J. J., and Stead, D., Cambridge University Press, Cambridge, UK, 59-70, <https://doi.org/10.1017/CBO9780511740367.007>, 2012.
- Hermanns, R. L., Niedermann, S., Ivy-Ochs, S., and Kubik, P. W.: Rock avalanching into a landslide-dammed lake causing multiple dam failure in Las Conchas valley (NW Argentina) - evidence from surface exposure dating and stratigraphic analyses, *Landslides*, 1, 113-122,
- 455 <https://doi.org/10.1007/s10346-004-0013-5>, 2004.



- Hewitt, K.: Rock avalanches with complex runout and emplacement, Karakoram Himalaya, Inner Asia, in: *Landslides from Massive Rock Slope Failure*, edited by: Evans, S. G., Scarascia-Mugnozza, G., Strom, A. L., and Hermanns, R. L., NATO Sci. S., 49, 521-550, [https://doi.org/10.1007/978-1-4020-4037-5\\_28](https://doi.org/10.1007/978-1-4020-4037-5_28), 2006.
- Hewitt, K., Clague, J. J., and Orwin, J. F.: Legacies of catastrophic rock slope failures in mountain landscapes, *Earth-Sci. Rev.*, 87 (1-2), 1-38, <https://doi.org/10.1016/j.earscirev.2007.10.002>, 2008.
- Hoernes, R.: Der Querbruch von Santa Croce und die Bildung der Schuttmassen von Cima Fadalto und der Rovine di Vedana bei Belluno, *Zeitschrift der Deutschen Geologischen Gesellschaft*, 347-351, 1892.
- Hungr, O.: Landslide hazard assessment - goals and challenges, *Inn. Ass. Prof. Eng. Geosci.*, 8, 12-15, 2004.
- Hungr, O.: Rock avalanche occurrence, process and modelling, in: *Landslides from Massive Rock Slope Failure*, edited by: Evans, S. G., Scarascia-Mugnozza, G., Strom, A. L., and Hermanns, R. L., NATO Sci. S., 49, 243-266, [https://doi.org/10.1007/978-1-4020-4037-5\\_14](https://doi.org/10.1007/978-1-4020-4037-5_14), 2006.
- Ivy-Ochs, S., Martin, S., Campedel, P., Hippe, K., Alfimov, V., Vockenhuber, C., Andreotti, E., Carugati, G., Pasqual, D., Rigo, M., and Viganò, A.: Geomorphology and age of the Marocche di Dro rock avalanches (Trentino, Italy), *Quaternary Sci. Rev.*, 169, 188-205, <https://doi.org/10.1016/j.quascirev.2017.05.014>, 2017.
- Ivy-Ochs, S., Synal, H. A., Roth, C., and Schaller, M.: Initial results from isotope dilution for Cl and <sup>36</sup>Cl measurements at the PSI/ETH Zurich AMS facility, *Nucl. Instrum. Meth. B*, 223-224, 623-627, <https://doi.org/10.1016/j.nimb.2004.04.115>, 2004.
- Keefer, D. K.: The susceptibility of rock slopes to earthquake-induced failure, *Bull. Assoc. Eng. Geol.*, 30 (3), 353-361, 1993.
- Köpfl, P., Grämiger, L. M., Moore, J. R., Vockenhuber, C., and Ivy-Ochs, S.: The Oeschinensee rock avalanche, Bernese Alps, Switzerland: a co-seismic failure 2300 years ago?, *Swiss J. Geosci.*, 111(1-2), 205-219, <https://doi.org/10.1007/s00015-017-0293-0>, 2018.
- Loew, S., Gischig, V., Willenberg, H., Alpiger, A., and Moore, J.: Randa: kinematics and driving mechanisms of a large complex rockslide, in: *Landslides: Types, Mechanisms and Modeling*, edited by: Clague, J., and Stead, D., Cambridge University Press, Cambridge, UK, 297-309, <https://doi.org/10.1017/CBO9780511740367.025>, 2012.
- Loew, S., Gschwind, S., Gischig, V., Keller-Signer, A., and Valenti, G.: Monitoring and early warning of the 2012 Preonzo catastrophic rockslope failure, *Landslides*, 14 (1), 141-154, <https://doi.org/10.1007/s10346-016-0701-y>, 2017.
- Macklin, M. G., Benito, G., Gregory, K. J., Johnstone, E., Lewin, J., Michczyńska, D. J., Soja, R., Starkel, L., and Thorndycraft, V. R.: Past hydrological events reflected in the Holocene fluvial record of Europe, *Catena*, 66 (1), 145-154, <https://doi.org/10.1016/j.catena.2005.07.015>, 2006.
- Magoga, L. S., and Marin, F. (Eds.): *La certosa di Vedana. Storia, cultura e arte in un ambiente delle Prealpi Bellunesi*, Leo S. Olschki, Firenze, Italy, 1998.
- Marchi, L., Michieli, F., Zuppi, G. M.: The Allege Lake (Dolomites, Italy): environmental role and sediment management, in: *Environmental Role of Wetlands in Headwaters*, edited by: Krecek, J., and Haigh, M., NATO Sci. S. IV Ear. En., 63, 161-172, [https://doi.org/10.1007/1-4020-4228-0\\_14](https://doi.org/10.1007/1-4020-4228-0_14), 2006.
- Marrero, S. M., Phillips, F. M., Caffee, M. W., and Gosse, J. C.: CRONUS-Earth cosmogenic <sup>36</sup>Cl calibration, *Quat. Geochronol.*, 31, 199-219, <https://doi.org/10.1016/j.quageo.2015.10.002>, 2016.
- Martin, S., Campedel, P., Ivy-Ochs, S., Viganò, A., Alfimov, V., Vockenhuber, C., Andreotti, E., Carugati, G., Pasqual, D., and Rigo, M.: Lavini di Marco (Trentino, Italy): <sup>36</sup>Cl exposure dating of a polyphase rock avalanche, *Quat. Geochronol.*, 19, 106-116, <https://doi.org/10.1016/j.quageo.2013.08.003>, 2014.



- Márton, E., Drobne, K., Čosović, V., and Moro, A.: Palaeomagnetic evidence for Tertiary counterclockwise rotation of Adria, *Tectonophysics*, 377 (1-2), 143-156, <https://doi.org/10.1016/j.tecto.2003.08.022>, 2003.
- 495 Masetti, D., and Bianchin, G.: Geologia del Gruppo dello Schiara (Dolomiti Bellunesi): Suo inquadramento nell'evoluzione giurassica del margine orientale della piattaforma di Trento, *Mem. Sci. Geol.*, 39, 187-212, 1987.
- Mazzuoli, L.: Sull'origine delle rovine di Vedana, *Club Alpino Italiano, sez. di Agordo, Adunanza straordinaria dei soci il 22-8-1875 in Vedana*, 11-17, 1875.
- Merchel, S., Braucher, R., Alfimov, V., Bichler, M., Bourlès, D. L., and Reitner, J. M.: The potential of historic rock avalanches and man-made  
 500 structures as chlorine-36 production rate calibration sites, *Quat. Geochronol.*, 18, 54-62, <https://doi.org/10.1016/j.quageo.2013.07.004>, 2013.
- Miari, F.: *Compendio storico della regia città di Belluno e sua antica provincia*, Giuseppe Picotti, Venezia, Italy, 1830.
- Mitchell, W. A., McSaveney, M. J., Zondervan, A., Kim, K., Dunning, S. A., and Taylor, P. J.: The Keylong Serai rock avalanche, NW Indian Himalaya: geomorphology and palaeoseismic implications, *Landslides*, 4 (3), 245-254, <https://doi.org/10.1007/s10346-007-0085-0>, 2007.
- 505 Montandon, F.: Chronologie des grands éboulements alpins du début de l'ère chrétienne à nos jours, *Matér. étude calam.*, 32, 271-337, 1933.
- More, K. S., and Wolkersdorfer, C.: An analogue Toma Hill formation model for the Tyrolian Fernpass rockslide, *Landslides*, 16, 1855-1870, <https://doi.org/10.1007/s10346-019-01211-w>, 2019.
- Nicoletti, P. G., and Sorriso-Valvo, M.: Geomorphic controls of the shape and mobility of rock avalanches, *Geol. Soc. Am. Bull.*, 103 (10), 1365-1373, [https://doi.org/10.1130/0016-7606\(1991\)103<1365:GCOTSA>2.3.CO;2](https://doi.org/10.1130/0016-7606(1991)103<1365:GCOTSA>2.3.CO;2), 1991.
- 510 Ostermann, M., Ivy-Ochs, S., Sanders, D., and Prager, C.: Multi-method (14C, 36Cl, 234U/230Th) age bracketing of the Tschirgant rock avalanche (Eastern Alps): implications for absolute dating of catastrophic mass-wasting, *Earth Surf. Proc. Land.*, 42 (7), 1110-1118, <https://doi.org/10.1002/esp.4077>, 2017.
- Pánek, T., Hradecký, J., Šilhán, K., Smolková, V., and Altová, V.: Time constraints for the evolution of a large slope collapse in karstified mountainous terrain of the southwestern Crimean Mountains, Ukraine, *Geomorphology*, 108 (3-4), 171-181, <https://doi.org/10.1016/j.geomorph.2009.01.003>, 2009.
- 515 Parker, R., Petley, D., Densmore, A., Rosser, N., Damby, D., and Brain, M.: Progressive failure cycles and distributions of earthquake-triggered landslides, in: *Earthquake-Induced Landslides*, edited by: Ugai, K., Yagi, H., and Wakai, A., Springer, Berlin, Heidelberg, Germany, 755-762, [https://doi.org/10.1007/978-3-642-32238-9\\_82](https://doi.org/10.1007/978-3-642-32238-9_82), 2013.
- Patzelt, G.: The rock avalanches of Tschirgant and Haiming (Upper Inn Valley, Tyrol, Austria), comment on the map supply, *Jb. Geol. B-A*,  
 520 152 (1-4), 13-24, 2012.
- Pellegrini, G. B. (Ed.): *Note illustrative della Carta Geomorfologica d'Italia - Foglio Belluno. Regione Veneto - Servizio Geologico d'Italia*, 2000.
- Pellegrini, G. B., and Caneve, L.: *Carta geomorfologica delle Masiere di Vedana nel Vallone Bellunese (Belluno) - scale 1:25,000, S.EL.CA.*, Firenze, Italy, 2005.
- 525 Pellegrini, G. B., and Surian, N.: Geomorphological study of the Fadalto landslide, Venetian Prealps, Italy, *Geomorphology*, 15 (3-4), 337-350, [https://doi.org/10.1016/0169-555X\(95\)00079-K](https://doi.org/10.1016/0169-555X(95)00079-K), 1996.
- Pellegrini, G. B., Surian, N., and Albanese, D.: Landslide activity in response to alpine deglaciation: the case of the Belluno Prealps (Italy), *Geogr. Fis. Din. Quat.*, 29, 185-196, 2006.
- Piloni, G.: *Historia della Città di Belluno*, Venezia, Italy, 1607.



- 530 Prager, C., Ivy-Ochs, S., Ostermann, M., Synal, H. A., and Patzelt, G.: Geology and radiometric  $^{14}\text{C}$ -,  $^{36}\text{Cl}$ - and Th-/U-dating of the Fernpass rockslide (Tyrol, Austria), *Geomorphology*, 103 (1), 93-103, <https://doi.org/10.1016/j.geomorph.2007.10.018>, 2009.
- Preisig, G., Gischig, V., Eberhardt, E., and Hungr, O.: Hydromechanical versus seismic fatigue in progressive failure of deep-seated landslides, in: 13th ISRM International Congress of Rock Mechanics. International Society for Rock Mechanics and Rock Engineering, Montreal, Canada, 10-13 May 2015, <https://doi.org/10.13140/RG.2.1.2565.0081>, 2015.
- 535 Pudasaini, S. P., and Miller, S. A.: The hypermobility of huge landslides and avalanches, *Eng. Geol.*, 157, 124-132, <https://doi.org/10.1016/j.enggeo.2013.01.012>, 2013.
- Rossato, S., Fontana, A., and Mozzi, P.: Meta-analysis of a Holocene  $^{14}\text{C}$  database for the detection of paleohydrological crisis in the Venetian-Friulian Plain (NE Italy), *Catena*, 130, 34-45, <https://doi.org/10.1016/j.catena.2014.10.033>, 2015.
- Rossato, S., Martin, S., Ivy-Ochs, S., Viganò, A., Vockenhuber, C., Rigo, M., Surian, N., and Mozzi, P.: Post-LGM catastrophic landslides in  
 540 the Dolomites: when, where and why, *Alp. Mediterr. Quat.*, 31 (1), 239-242, <https://doi.org/10.26382/AIQUA.2018.AIQUAconference>, 2018.
- Rovida, A. N., Locati, M., Camassi, R. D., Lolli, B., and Gasperini, P. (Eds.): CPTI15, the 2015 version of the Parametric Catalogue of Italian Earthquakes, Istituto Nazionale di Geofisica e Vulcanologia, <http://doi.org/10.6092/INGV.IT-CPTI15>, 2016.
- Samia, J., Temme, A., Bregt, A., Wallinga, J., Guzzetti, F., Ardizzone, F., and Rossi, M.: Do landslides follow landslides? Insights in path  
 545 dependency from a multi-temporal landslide inventory, *Landslides*, 14 (2), 547-558, <https://doi.org/10.1007/s10346-016-0739-x>, 2017.
- Sandron, D., Renner, G., Rebez, A., and Slejko, D.: Early instrumental seismicity recorded in the eastern Alps, *B. Geofis. Teor. Appl.*, 55 (4), 755-788, <http://doi.org/10.4430/bgta0118>, 2014.
- Sauro, F., Zampieri, D., and Filipponi, M.: Development of a deep karst system within a transpressional structure of the Dolomites in north-east Italy, *Geomorphology*, 184, 51-63, <https://doi.org/10.1016/j.geomorph.2012.11.014>, 2013.
- 550 Schuster, R. L., and Wieczorek, G. F.: Landslide triggers and types, in: *Landslides: proceedings of the first European conference on landslides*, edited by: Rybár, J., Stemberk, J., and Wagner, P., Taylor and Francis, Prague, Czech Republic, 59-78, 2002.
- Sewell, R. J., Barrows, T. T., Campbell, S. D. G., and Fifield, L. K.: Exposure dating ( $^{10}\text{Be}$ ,  $^{26}\text{Al}$ ) of natural terrain landslides in Hong Kong, China, *Geol. S. Am. S.*, 415, 131-146, [https://doi.org/10.1130/2006.2415\(08\)](https://doi.org/10.1130/2006.2415(08)), 2006.
- Sosio, R., Crosta, G. B., and Hungr, O.: Complete dynamic modeling calibration for the Thurwieser rock avalanche (Italian Central Alps),  
 555 *Eng. Geol.*, 100 (1-2), 11-26, <https://doi.org/10.1016/j.enggeo.2008.02.012>, 2008.
- Squinabol, S.: Venti giorni sui Monti Bellunesi, Tip. Raffaello Giusti, Livorno, Italy, 1902.
- Stead, D., and Wolter, A.: A critical review of rock slope failure mechanisms: the importance of structural geology, *J. Struct. Geol.*, 74, 1-23, <https://doi.org/10.1016/j.jsg.2015.02.002>, 2015.
- Stone, J. O.: Air pressure and cosmogenic isotope production, *J. Geophys. Res.-Sol. Ea.*, 105 (B10), 23753-23759,  
 560 <https://doi.org/10.1029/2000JB900181>, 2000.
- Strom, A.: Morphology and internal structure of rockslides and rock avalanches: grounds and constraints for their modelling, in: *Landslides from Massive Rock Slope Failure*, edited by: Evans, S. G., Mugnozza, G. S., Strom, A., and Hermanns, R. L., NATO Sci. S., 49, 305-326, [https://doi.org/10.1007/978-1-4020-4037-5\\_17](https://doi.org/10.1007/978-1-4020-4037-5_17), 2006.
- Styllas, M. N., Schimmelpfennig, I., Benedetti, L., Ghilardi, M., and ASTER Team: Late-glacial and Holocene history of the northeast  
 565 Mediterranean mountains-New insights from in situ-produced  $^{36}\text{Cl}$ -based cosmic ray exposure dating of paleo-glacier deposits on Mount Olympus, Greece, *Quaternary Sci. Rev.*, 193, 244-265, <https://doi.org/10.1016/j.quascirev.2018.06.020>, 2018.



- Takahashi, T.: Process of occurrence, flow and deposition of viscous debris flow, in: *River, Coastal and Estuarine Morphodynamics*, edited by: Seminara, G., and Blondeaux, P., Springer, Berlin, Germany, 93-118, [https://doi.org/10.1007/978-3-662-04571-8\\_5](https://doi.org/10.1007/978-3-662-04571-8_5), 2001.
- Taramelli, T.: *Note alla Carta Geologica della Provincia di Belluno*, Ed. Fusi, Pavia, Italy, 1883.
- 570 Trigila, A., Iadanza, C., and Guerrieri, L.: The IFFI project (Italian landslide inventory): Methodology and results, in: *Guidelines for Mapping Areas at Risk of Landslides in Europe*, edited by: Hervás, J., 15-18, <https://doi.org/10.2788/63147>, 2007.
- Trigila, A., Iadanza, C., Bussetini, M., and Lastoria, B.: *Dissesto idrogeologico in Italia: pericolosità e indicatori di rischio*. Edizione 2018, ISPRA, Rapporti 287/2018, 2018.
- Tsai, T. L., and Wang, J. K.: Examination of influences of rainfall patterns on shallow landslides due to dissipation of matric suction, *Environ. Earth Sci.*, 63 (1), 65-75, <https://doi.org/10.1007/s12665-010-0669-1>, 2011.
- 575 Turnau, V.: *Beiträge zur Geologie der Berner-Alpen*, 1. Der prähistorische Bergsturz von Kandersteg, 2, Buchdruckerei KJ Wyss, Bern, Switzerland, 1906.
- Venzo, S.: Osservazioni geotettoniche e geomorfologiche sul rilevamento del Foglio Belluno, B. Soc. Geol. Ital., 58, 433-451, 1939.
- Vigano`, A., Scafidi, D., Martin, S., and Spallarossa, D.: Structure and properties of the Adriatic crust in the central-eastern Southern Alps (Italy) from local earthquake tomography, *Terra Nova*, 25, 504-512, <https://doi.org/10.1111/ter.12067>, 2013.
- 580 Viganò, A., Scafidi, D., Ranalli, G., Martin, S., Della Vedova, B., and Spallarossa, D.: Earthquake relocations, crustal rheology, and active deformation in the central-eastern Alps (N Italy), *Tectonophysics*, 661, 81-98, <https://doi.org/10.1016/j.tecto.2015.08.017>, 2015.
- Vockenhuber, C., Miltenberger, K. U., and Synal, H. A.: <sup>36</sup>Cl measurements with a gas-filled magnet at 6 MV, *Nucl. Instrum. Meth. B*, 455, 190-194, <https://doi.org/10.1016/j.nimb.2018.12.046>, 2019.
- 585 von Poschinger, A., and Ruegg, T.: Die Churer Tomahügel, ein besonderes Zeugnis der Landschaftsgenese, *Jber. Natf. Ges. Graubünden*, 117, 93-100, 2012.
- Welkner, D., Eberhardt, E., and Hermanns, R. L.: Hazard investigation of the Portillo Rock Avalanche site, central Andes, Chile, using an integrated field mapping and numerical modelling approach, *Eng. Geol.*, 114 (3-4), 278-297, <https://doi.org/10.1016/j.enggeo.2010.05.007>, 2010.
- 590 Wieczorek, G. F.: Landslide triggering mechanisms, in: *Landslides: Investigation and Mitigation*, edited by: Turner, A. K., and Schuster, R. L., Transportation Research Board, National Research Council, Special Report, Washington DC, USA, 76-90, 1996.
- Wirth, S. B., Glur, L., Gilli, A., and Anselmetti, F. S.: Holocene flood frequency across the Central Alps - solar forcing and evidence for variations in North Atlantic atmospheric circulation, *Quaternary Sci. Rev.*, 80, 112-128, <https://doi.org/10.1016/j.quascirev.2013.09.002>, 2013.



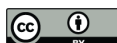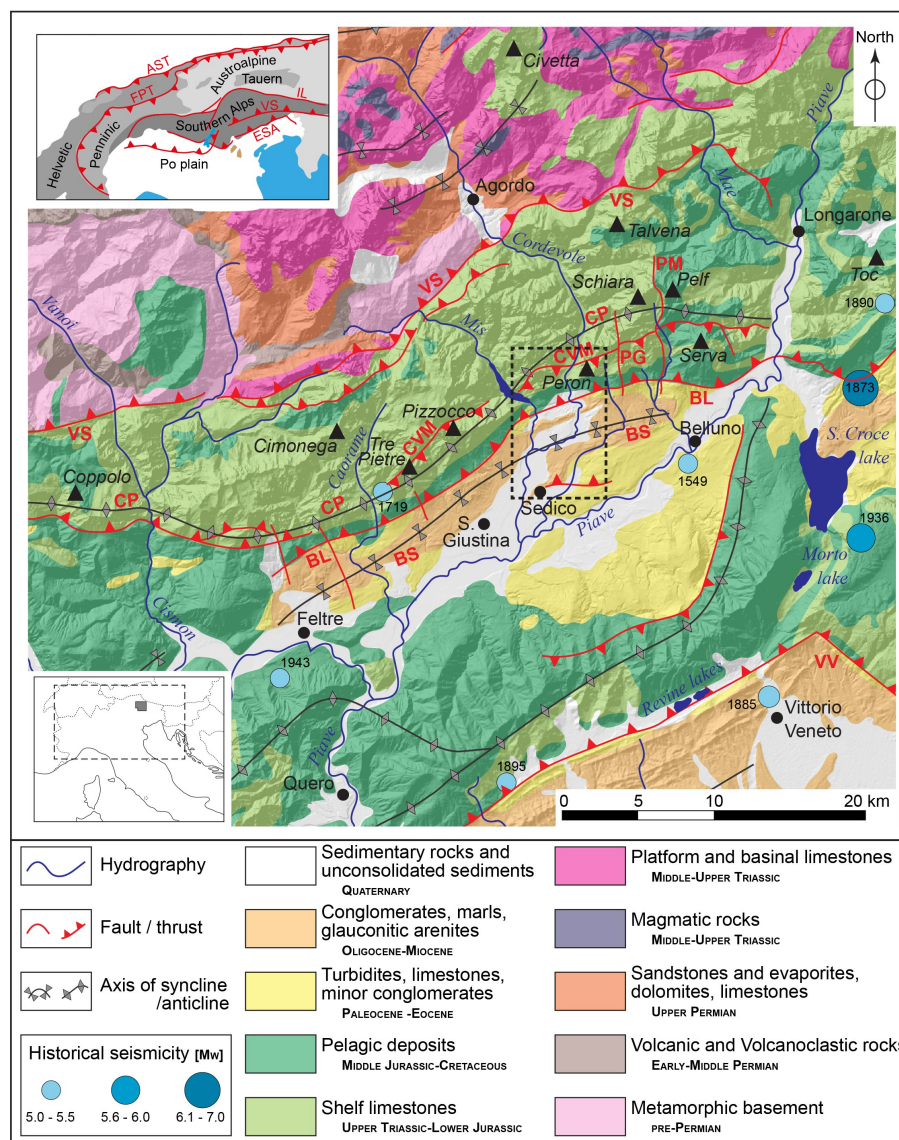

**Figure 1.** Simplified geological map (black dashed-line box indicates location of Fig. 3). The map is based on Bosellini et al. (1981); Masetti and Bianchin (1987); Bigi et al. (1990); Costa et al. (1996). Epicenters of earthquakes from the last two millennia are shown with color coding and year of occurrence (source: Parametric Catalogue of Italian Earthquakes, 2015 version Rovida et al., 2016). Base map is the SRTM derived Digital Elevation Model (30-m cells) (source: <http://viewfinderpanoramas.org/>). Structural setting is shown in inset upper left (based on Doglioni, 1990). AST: Alpine Sole thrust; BL: Belluno thrust; BS: Belluno syncline; CP: Coppolo-Pelf anticline; CVM: Val Carpenada-Val di Vido-Val Madonuta thrust; ESA: eastern Southern Alps thrust system; FPT: Frontal Penninic thrust; IL: Insubric line; PG: Pala Alta-Gresal; PM: Pala Bassa-Val Medone; VS: Valsugana thrust; VV: Vittorio Veneto thrust.



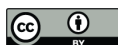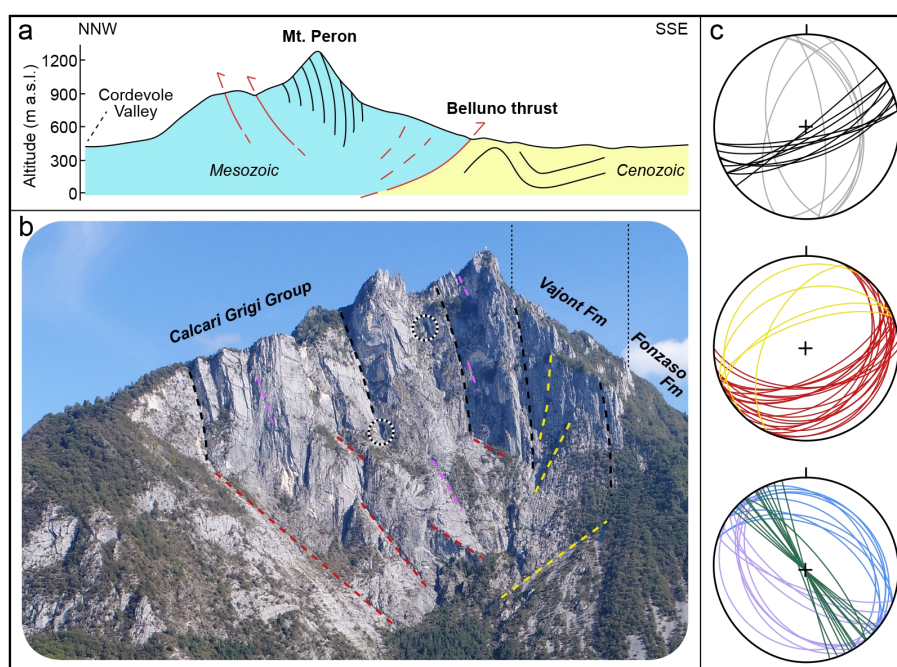

**Figure 2.** Structural scheme of the Mt. Peron release scarp. **a:** Schematic geological cross-section. **b:** Photograph with major structural elements and larger karst caves (black-and-white circles) highlighted. **c:** Lower hemisphere stereographic projection of principal structural elements. Colours in b and c correspond to the following: bedding (black), N-S reactivated Jurassic fault-related planes (grey), basal trenches and other high-angle fractures connected to the Belluno thrust (yellow) and backthrust (red), fractures related to the NNW-SSE fault system (light blue), their conjugates (pink) and high-angle fractures with the same orientation (green).

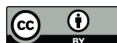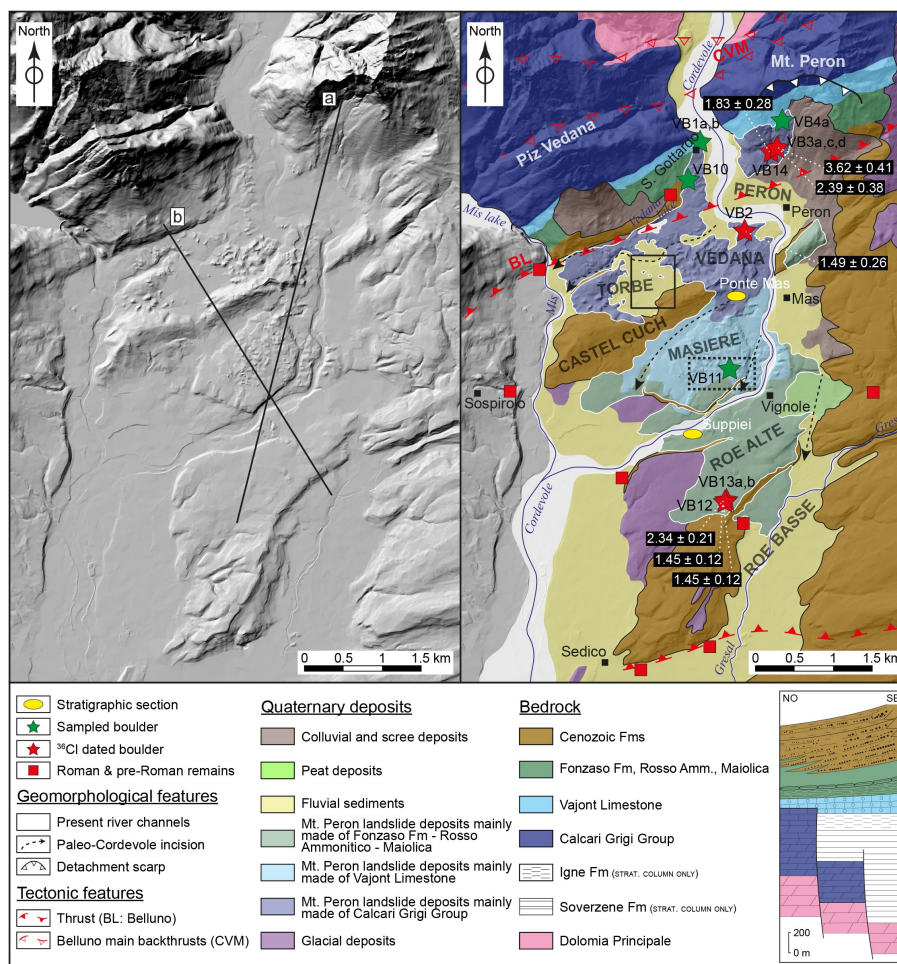

**Figure 3.** Geological map of the study area, based on own field surveys and previous studies (Pellegrini, 2000; Pellegrini and Caneve, 2005), overlain on a 5-m cell DTM (open data released by Regione Veneto: <http://idt.regione.veneto.it/app/metacatalog/>). The boundary of Mt. Peron rock avalanche deposits is marked with solid white line, whilst the contact between Quaternary sediments and bedrock is shown with solid black line. The location of boulders sampled for dating (red stars) and/or thin section analysis (green stars) are shown. Obtained  $^{36}\text{Cl}$  exposure ages are in ka. Sites of Roman and pre-Roman archeological findings are indicated by red squares (from Capuis et al., 1988). Solid lines in the left frame correspond to the traces of the stratigraphic profiles in Fig. 4. Location of stratigraphic sections (yellow ellipses; Fig. 5) and paleo-Cordevole paths (black dashed arrows) are shown. The extent of Fig. 6 (dotted black box) and Fig. SM4 (solid black box; Supplementary Material) is indicated. In the lower right, a stratigraphic sketch of bedrock formations cropping out in the Belluno area is given (modified from Costa et al., 1996).

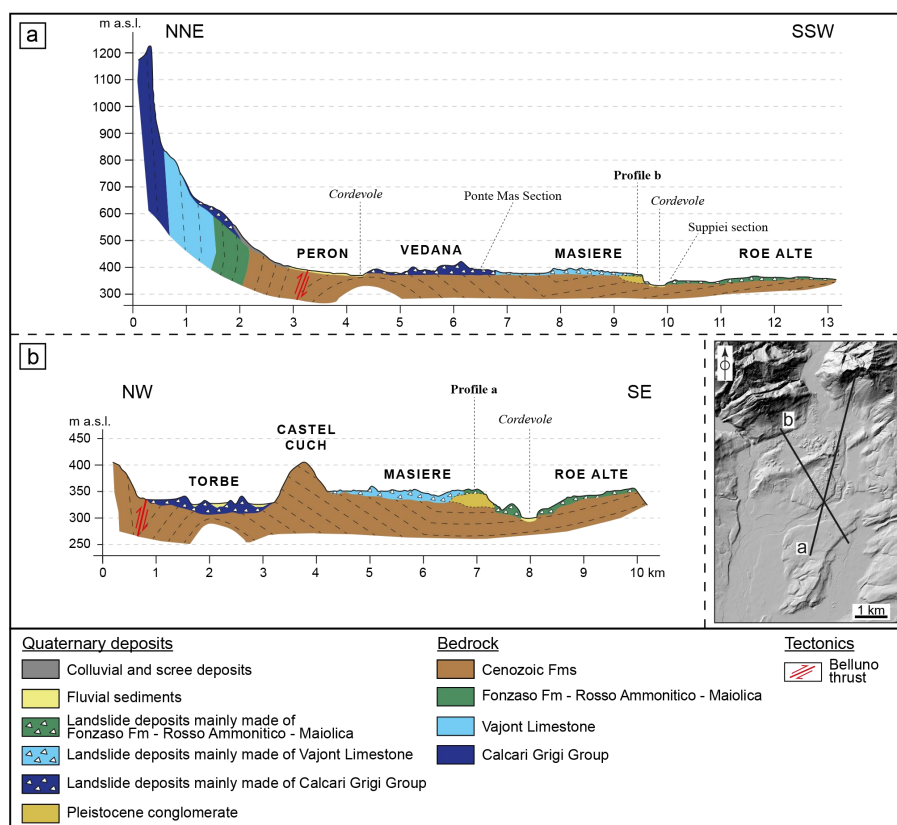

**Figure 4.** Geologic profiles of the Mt. Peron rock avalanche deposits (modified from Costa et al., 1996). Traces of the profiles are shown in the small DTM and in Fig. 3a, their extent being equal. The discussed sectors of the Mt. Peron rock avalanche, Vedana, Torbe, Masiere and Roe Alte, are indicated, along with the location of Ponte Mas and Suppiei stratigraphic sections (Fig. 5g, h). The vertical bedding and interpreted Belluno thrust are shown schematically. Note the preservation of bedrock stratigraphic order in the rock avalanche deposits from older to younger proximal to distal: Calcarei Grigi Group, Vajont Limestone, Fonzaso Formation-Rosso Ammonitico-Maiolica.



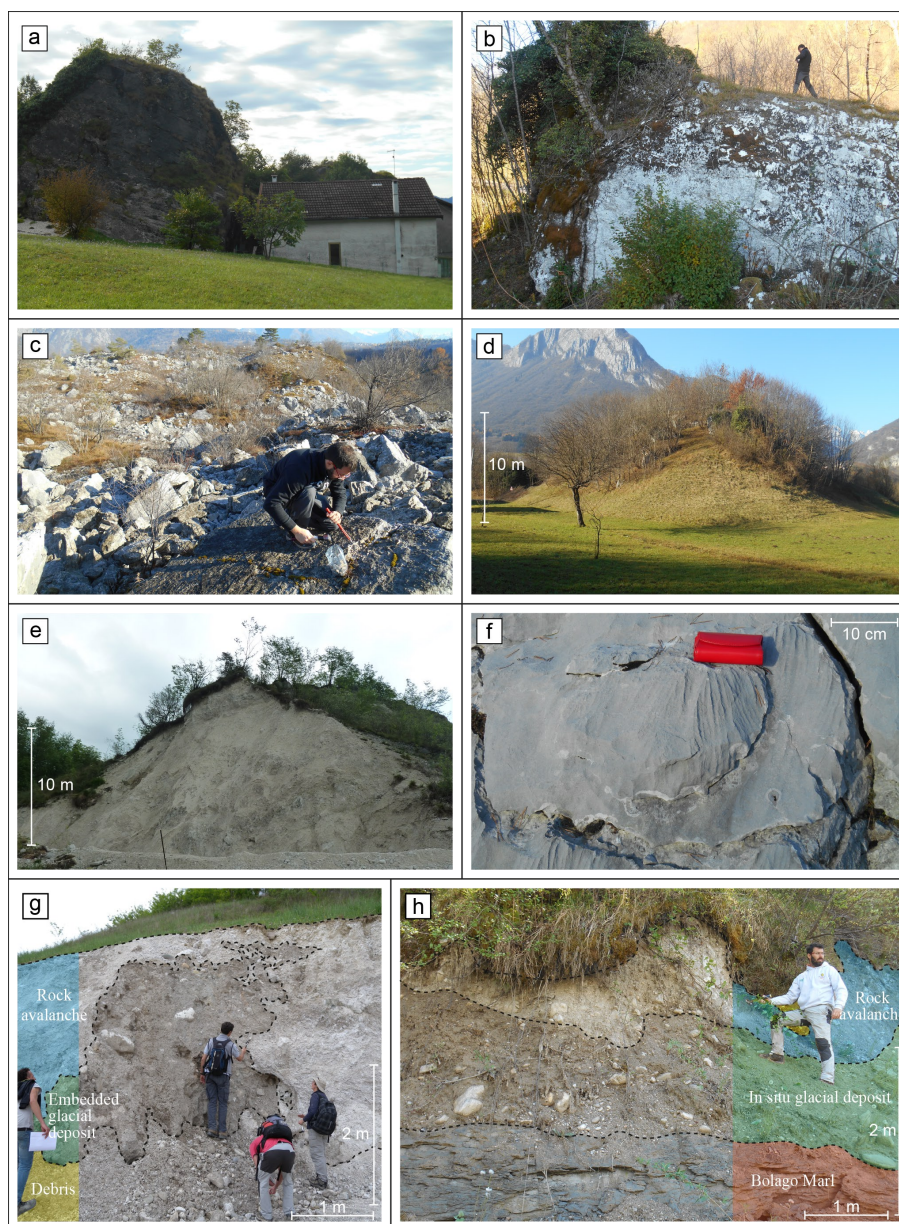

**Figure 5.** Photos of the deposits (**a**: decametric boulder, Peron alluvial terrace; **b**: plurimetric boulder, Vedana sector; **c**: metric boulders, Masiere sector; **d**: toma relief in the Torbe sector; **e**: open section of a toma, Torbe sector; **f**: karst evidence on a boulder, Masiere sector) and stratigraphic sections described in the text (**g**: Ponte Mas section: incorporation of the underlying glacial deposit (green) into the rock avalanche deposit (light blue) is shown; **h**: Suppiei section: glacial sediments (green), covered by rock avalanche deposit (light blue), rest directly on bedrock (red); locations in Figs. 3, 4).

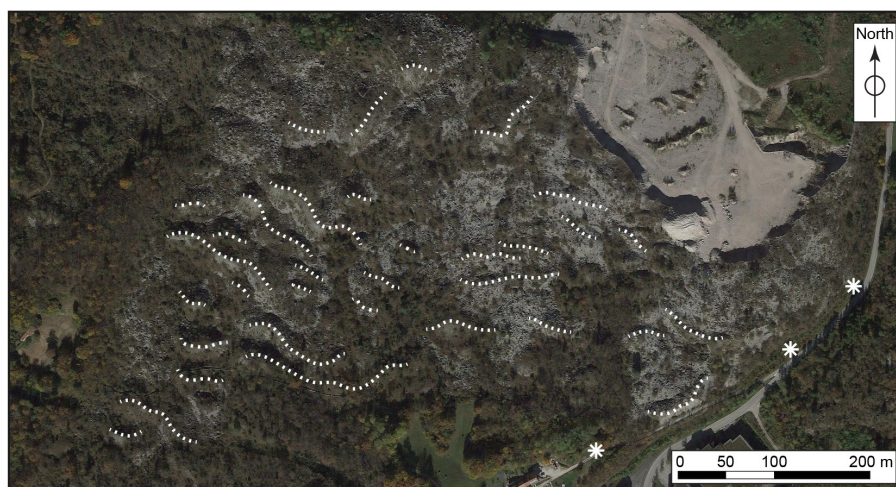

**Figure 6.** Transverse ridges in the south-western part of the Masiere sector (basemap source: © Google Earth). Location of image shown in Fig. 3. The rock avalanche **was moving** (from north to south) over a slight topographic high made up of Pleistocene conglomerate (see Fig. 4), the ridges are interpreted as **compressional**. White stars indicate locations where the contact between the rock avalanche and the conglomerate is exposed.

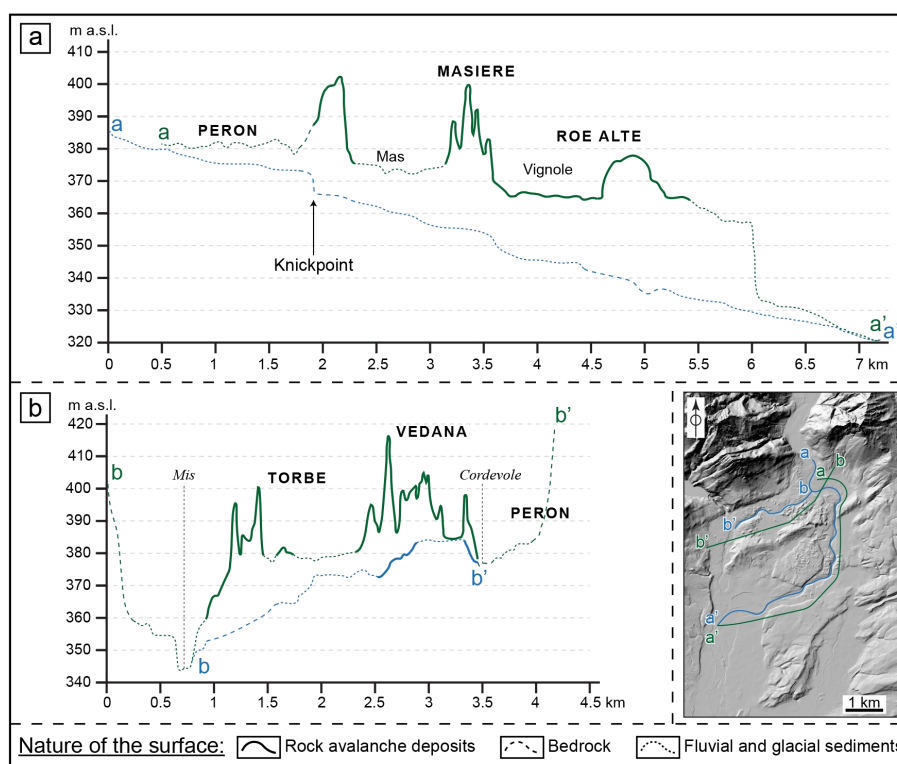

**Figure 7.** Curvilinear topographic profiles (10X vertical exaggeration) showing the relationship between the bigger incisions and the external main surfaces related to the rock-avalanche and the post-event evolution. Profiles correspond to the present course of Cordevole creek (**blue line in a**) paired with the main topographic surfaces on its left bank (**green line in a**) and the main incision passing through the Torbe and Vedana sectors (**blue line in b**) paired with the main topographic surfaces on its left side (**green line in b**). Traces of the profiles are shown in the small DTM, that corresponds to Fig. 3.



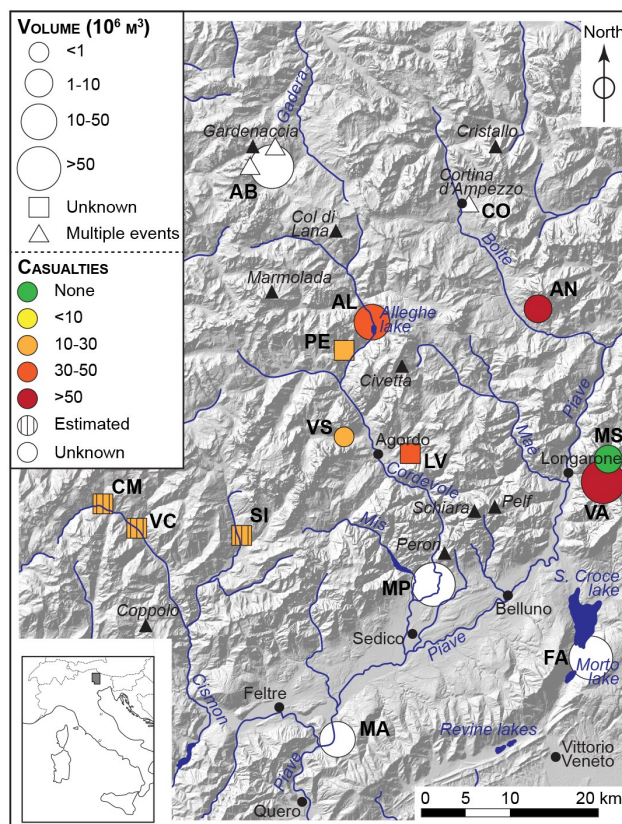

**Figure 8.** Largest and most damaging (in terms of human lives) landslides located near Mt. Peron (base map is a SRTM derived Digital Elevation Model with 30-m cells; source: <http://viewfinderpanoramas.org/>). Volumes of deposits correspond to the size of the symbols, casualties are shown with color coding. AB: Alta Badia, several events between 11,500 BP-present (Borgatti et al., 2004), AL: Allege, 1771 AD (Ermini and Casagli, 2003), AN: Antelao, 1814 AD (Montandon, 1933), CM: Col Mandro, 1825 AD (Montandon, 1933), CO: Cortina d'Ampezzo, several events between 10,700-2,000 BP (Borgatti and Soldati, 2010), FA: Fadalto, Lateglacial-to-present (Pellegrini and Surian, 1996), LV: La Valle. 1701 AD (Montandon, 1933), MA: Marziai, 17,500-15,000 BP (Pellegrini et al., 2006), MS: Mt. Salta, 1674 AD (Montandon, 1933), PE: Pecol, 1841 AD (Montandon, 1933), MP: Mt. Peron,  $1.90 \pm 0.45$  ka (this work), SI: Siror, 1348 AD (Montandon, 1933), VA: Vajont, 1963 AD (Borgatti et al., 2004), VC: Val Cia, 1882 AD (Montandon, 1933), VS: Valle San Lucano, 1908 AD (Aldighieri et al., 2016).

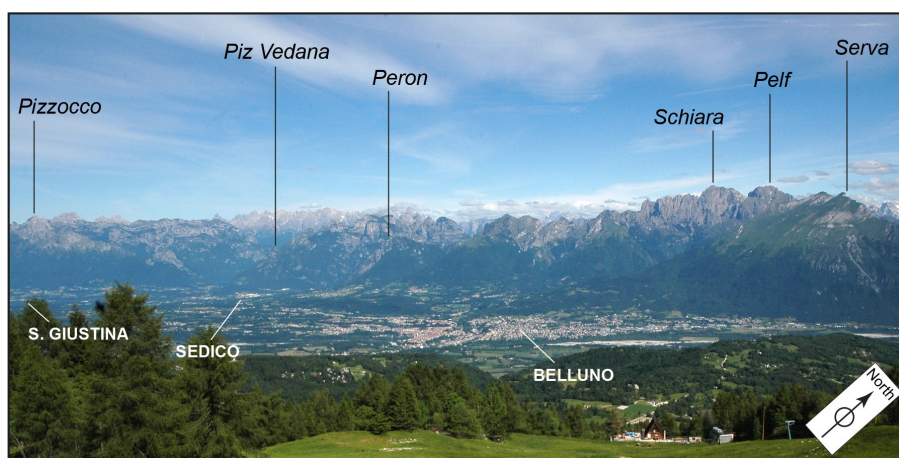

**Figure 9.** Panoramic view of the northern side of the Piave Valley, with major peaks belonging to the studied deformation belt.



**Table 1.** Sample site information, AMS data and  $^{36}\text{Cl}$  exposure ages. Samples VB3a and VB3c are not from the same boulder, whilst VB13a and VB13b are (weighted mean given). No erosion correction was made.

| Sample name | Lithology        | Boulder height<br>(m) | Latitude | Longitude | Elevation<br>(m a.s.l.) | Shielding* | Thick.<br>(cm) | Cl<br>(ppm)    | $^{36}\text{Cl}$<br>(104 atoms/g) | Age<br>(ka)     |
|-------------|------------------|-----------------------|----------|-----------|-------------------------|------------|----------------|----------------|-----------------------------------|-----------------|
| VB2         | Calcarei Grigi   | 6                     | 46.1593  | 12.1202   | 395                     | 0.986      | 2              | $32.7 \pm 1.1$ | $4.37 \pm 0.75$                   | $1.49 \pm 0.26$ |
| VB3a        | Rosso Ammonitico | 2                     | 46.1686  | 12.1253   | 520                     | 0.526      | 3              | $20.5 \pm 0.3$ | $3.22 \pm 0.48$                   | $1.83 \pm 0.28$ |
| VB3c        | Fonzaso          | 20                    | 46.1686  | 12.1253   | 530                     | 0.518      | 2              | $20.3 \pm 0.1$ | $6.29 \pm 0.69$                   | $3.62 \pm 0.41$ |
| VB12        | Vajont           | 1.5                   | 46.1261  | 12.1167   | 392                     | 0.993      | 7              | $29.6 \pm 0.2$ | $7.14 \pm 0.56$                   | $2.34 \pm 0.21$ |
| VB13a#      | Vajont           | 5                     | 46.1261  | 12.1167   | 396                     | 0.935      | 2              | $18.9 \pm 0.1$ | $3.87 \pm 0.28$                   | $1.45 \pm 0.12$ |
| VB13b#      | Vajont           | 5                     | 46.1261  | 12.1167   | 396                     | 0.955      | 2.2            | $20.4 \pm 0.2$ | $4.01 \pm 0.30$                   | $1.45 \pm 0.12$ |
| VB14        | Calcarei Grigi   | 15                    | 46.1683  | 12.1234   | 470                     | 0.555      | 5.5            | $8.0 \pm 0.1$  | $5.15 \pm 0.83$                   | $2.39 \pm 0.38$ |

\*=Shielding includes surround topography and dip of sampled surface. #=Sample from same surface on same boulder, mean age is  $1.45 \pm 0.08$  ka.
